# Supplementary material for: Metal-/catalyst-free one-pot three-component thioamination of 1,4-naphthoquinone in a sustainable solvent
Source: Royal Society of Chemistry journal article supplement (doi:10.1039/d1nj05741c), 2022-01-01

# Supporting Information

## **Eco-friendly metal-/catalyst-free one-pot three-component thioamination of 1,4-naphthoquinone in green solvent**

Li Xiong,<sup>#a</sup> Shuai-Qi He,<sup>#b</sup> Jie Pan,<sup>b</sup> Bing Yu<sup>\*b</sup>

<sup>a</sup>Department of Bioengineering, Zhuhai Campus of Zunyi Medical University, Zhuhai 519041, Guangdong Province, China.

<sup>b</sup>Green Catalysis Center, College of Chemistry, Zhengzhou University, Kexue Road No. 100, Zhengzhou 450001, China. *E-mail: bingyu@zzu.edu.cn.*

<sup>#</sup>These authors contributed equally

### Table of Contents

|     |                                                                        |    |
|-----|------------------------------------------------------------------------|----|
| 1.  | General information .....                                              | 2  |
| 2.  | Experimental operation process .....                                   | 2  |
| 2.1 | Preparation of deep eutectic solvents .....                            | 2  |
| 2.2 | Experimental procedure for the synthesis of 4a-4o .....                | 2  |
| 2.3 | Experimental procedure for the synthesis of 5a-5f .....                | 2  |
| 2.4 | Condition optimization .....                                           | 3  |
| 2.5 | Application of this one-pot thioamination in green solvent .....       | 3  |
| 2.6 | Experimental procedure for control experiments .....                   | 4  |
| 2.7 | The calculation of green chemistry metrics .....                       | 5  |
| 2.8 | Byproduct analysis .....                                               | 7  |
| 3.  | Characterization data .....                                            | 7  |
| 4.  | <sup>1</sup> H, <sup>13</sup> C, and <sup>19</sup> F NMR spectra ..... | 16 |

## 1. General information

Solvents, naphthoquinones, thiophenols, and amines were purchased from commercial suppliers and used without further purification. Silica gel was purchased from Qing Dao Hai Yang Chemical Industry. The  $^1\text{H}$  NMR (400 MHz),  $^{13}\text{C}$  NMR (101 MHz), and  $^{19}\text{F}$  NMR (376 MHz) NMR spectra data were recorded on Bruker Avance 400 MHz spectrometer using  $\text{CDCl}_3$  as solvent at room temperature ( $20 \pm 2$  °C). To display multiplicities and signal forms correctly the following abbreviations were used: s = singlet, d = doublet, t = triplet, m = multiplet.  $^1\text{H}$  NMR and  $^{13}\text{C}$  NMR spectra were recorded with tetramethylsilane ( $\delta = 0.00$  ppm) as an internal reference. High-resolution mass spectra (HRMS) were obtained with a Waters Micromass Q-ToF Micro instrument using the ESI technique.

## 2. Experimental operation process

### 2.1 Preparation of deep eutectic solvents

**Choline chloride (ChCl) : Urea:** ChCl (0.03 mol, 4.1887 g) and urea (0.06 mol, 3.6033 g) were mixed in a small flask at a ratio of 1 : 2, then the two solids were slowly heated to 80 °C, stirred for 30 minutes and cooled to room temperature. Then the deep eutectic solvent with 100% atomic economy was obtained.

**ChCl : *p*-toluenesulfonic acid (*p*-TsOH) :** ChCl (0.02 mol, 2.7925 g) and *p*-TsOH (0.02 mol, 3.4440 g) were mixed in a small flask at a ratio of 1 : 1, then the two solids were slowly heated to 100 °C under  $\text{N}_2$  atmosphere, stirred for 40 minutes and cooled to room temperature. Then the colorless deep eutectic solvent was obtained.

**ChCl:Glycerol :** ChCl (0.015 mol, 2.0944 g) and glycerol (0.03 mol, 2.7627 g) were mixed in a small flask at a ratio of 1 : 2, then the two compounds were slowly heated to 80 °C, stirred for 30 minutes and cooled to room temperature. Then the colourless homogenous deep eutectic solvent was obtained.

### 2.2 Experimental procedure for the synthesis of 4a-4o

In a 25 mL reaction tube, 1,4-naphthoquinone **1a** (0.2 mmol), thiophenols **2** (0.3 mmol) and pyrrolidine **3a** (0.3 mmol) were dissolved in CPME (1.5 mL), and then the reaction tube was stirred in air at 70 °C for 6 h. After the reaction, the mixture was collected, and the residue was purified by silica gel column chromatography to obtain the desired products **4**.

### 2.3 Experimental procedure for the synthesis of 5a-5f

In a 25 mL reaction tube, 1,4-naphthoquinone **1a** (0.2 mmol), *p*-methylthiophenol **2a** (0.3 mmol), and aliphatic amines **3** (0.3 mmol) were dissolved in CPME (1.5 mL), and then the reaction tube was stirred in air at 70 °C for 6 h. After the reaction, the mixture was collected, and the residue was purified by silica gel column chromatography to obtain the desired products **5**.

## 2.4 Condition optimization

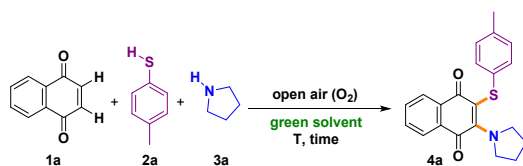

| Entry     | Solvent                            | Temp (°C) | Time (h) | Yield (%) <sup>b</sup> |
|-----------|------------------------------------|-----------|----------|------------------------|
| 1         | H <sub>2</sub> O                   | 35        | 12       | 10                     |
| 2         | CH <sub>3</sub> CH <sub>2</sub> OH | 35        | 12       | 26                     |
| 3         | PEG-200                            | 35        | 12       | 28                     |
| 4         | 2-MeTHF                            | 35        | 12       | 49                     |
| 5         | MBTE                               | 35        | 12       | 42                     |
| 6         | CPME                               | 35        | 12       | 55                     |
| 7         | DMC                                | 35        | 12       | 50                     |
| 8         | EC                                 | 35        | 12       | Trace                  |
| 9         | PC                                 | 35        | 12       | Trace                  |
| 10        | BMIMBF <sub>4</sub>                | 35        | 12       | Trace                  |
| 11        | ChCl:Urea (1:2)                    | 35        | 12       | 20                     |
| 12        | ChCl: <i>p</i> -TsOH (1:1)         | 35        | 12       | Trace                  |
| 13        | ChCl:Glycerol (1:2)                | 35        | 12       | 17                     |
| 14        | CPME                               | 35        | 9        | 55                     |
| 15        | CPME                               | 35        | 6        | 56                     |
| 16        | CPME                               | 35        | 3        | 51                     |
| 17        | CPME                               | 0         | 6        | 37                     |
| 18        | CPME                               | 60        | 6        | 75                     |
| <b>19</b> | <b>CPME</b>                        | <b>70</b> | <b>6</b> | <b>78</b>              |
| 20        | CPME                               | 80        | 6        | 65                     |
| 21        | CPME                               | 90        | 6        | 64                     |

<sup>a</sup>Reaction conditions: **1a** (0.2 mmol), **2a** (0.3 mmol), **3a** (0.3 mmol), solvent (1.5 mL), open air. PEG-200 = polyethylene glycol (molecular weight = 200), MBTE = methyl *tert*-butyl ether, DMC = dimethyl carbonate, EC = ethylene carbonate, PC = propylene carbonate, BMIMBF<sub>4</sub> = 1-butyl-3-methylimidazolium tetrafluoroborate, ChCl = choline chloride, *p*-TsOH = *p*-toluenesulfonic acid. <sup>b</sup>Yield was determined by <sup>1</sup>H NMR using 1,1,2,2-tetrachloroethane as the internal standard.

## 2.5 Application of this one-pot thioamination in green solvent

To a 250 mL flask, 1,4-naphthoquinone **1a** (5 mmol), *p*-methylthiophenol **2a** (7.5 mmol) and pyrrolidine **3a** (7.5 mmol) were dissolved in CPME (75 mL), and then the reaction flask was stirred in air at 70 °C for 6 h. After the reaction, the mixture was collected, and the residue was purified by column chromatography on silica gel to afford the desired products **4a** (Scheme S1a).

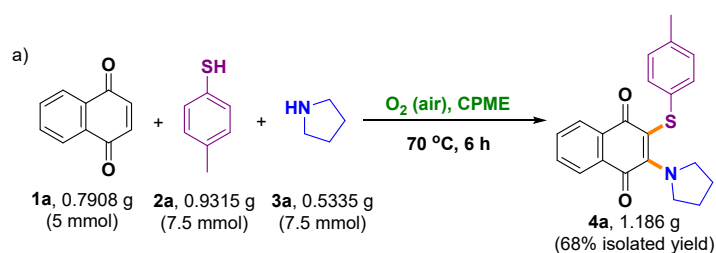

**Scheme S1.** Application of this one-pot thioamination in green solvent

## 2.6 Experimental procedure for control experiments

Experimental procedure for **Scheme S2(a)**: The 25 mL reaction tube containing the solution of 1,4-naphthoquinone **1a** (0.2 mmol), *p*-methylthiophenol **2a** (0.3 mmol) and pyrrolidine **3a** (0.3 mmol) in CPME (1.5 mL) was filled with nitrogen three times, and then the reaction tube was stirred in air at 70 °C for 6 h. After the reaction, product **4a** was detected by TLC.

Experimental procedure for **Scheme S2(c)**: In a 25 mL reaction tube, 1,4-naphthoquinone **1a** (0.2 mmol) and *p*-methylthiophenol **2a** (0.3 mmol) were dissolved in CPME (1.5 mL), and then the reaction tube was stirred in air at 70 °C for 6 h. After the reaction, the mixture was collected, and the residue was purified by silica gel column chromatography to obtain the desired product **7** in 63% yield.

Experimental procedure for **Scheme S2(d)**: In a 25 mL reaction tube, compound **6** (0.2 mmol) and *p*-methylthiophenol **2a** (0.3 mmol) were dissolved in CPME (1.5 mL), and then the reaction tube was stirred in air at 70 °C for 6 h. After the reaction, no product **4a** was detected by TLC.

Experimental procedure for **Scheme S2(e)**: In a 25 mL reaction tube, compound **7** (0.2 mmol) and pyrrolidine **3a** (0.3 mmol) were dissolved in CPME (1.5 mL), and then the reaction tube was stirred in air at 70 °C for 6 h. After the reaction, the mixture was collected, and the residue was purified by silica gel column chromatography to obtain the desired product **4a** in 61% yield.

Experimental procedure for **Scheme S2(f and g)**: In a 25 mL reaction tube, 1,4-naphthoquinone **1a** (0.2 mmol), *p*-methylthiophenol **2a** (0.3 mmol) and pyrrolidine **3a** (0.3 mmol) were dissolved in CPME (1.5 mL), in addition, a corresponding amount of additive (TEMPO or BQ) was added to the reaction system, and then the reaction tube was stirred in air at 70 °C for 6 h. After the reaction, the yield was determined by  $^1\text{H}$  NMR (1,1,2,2-tetrachloroethane as the internal standard).

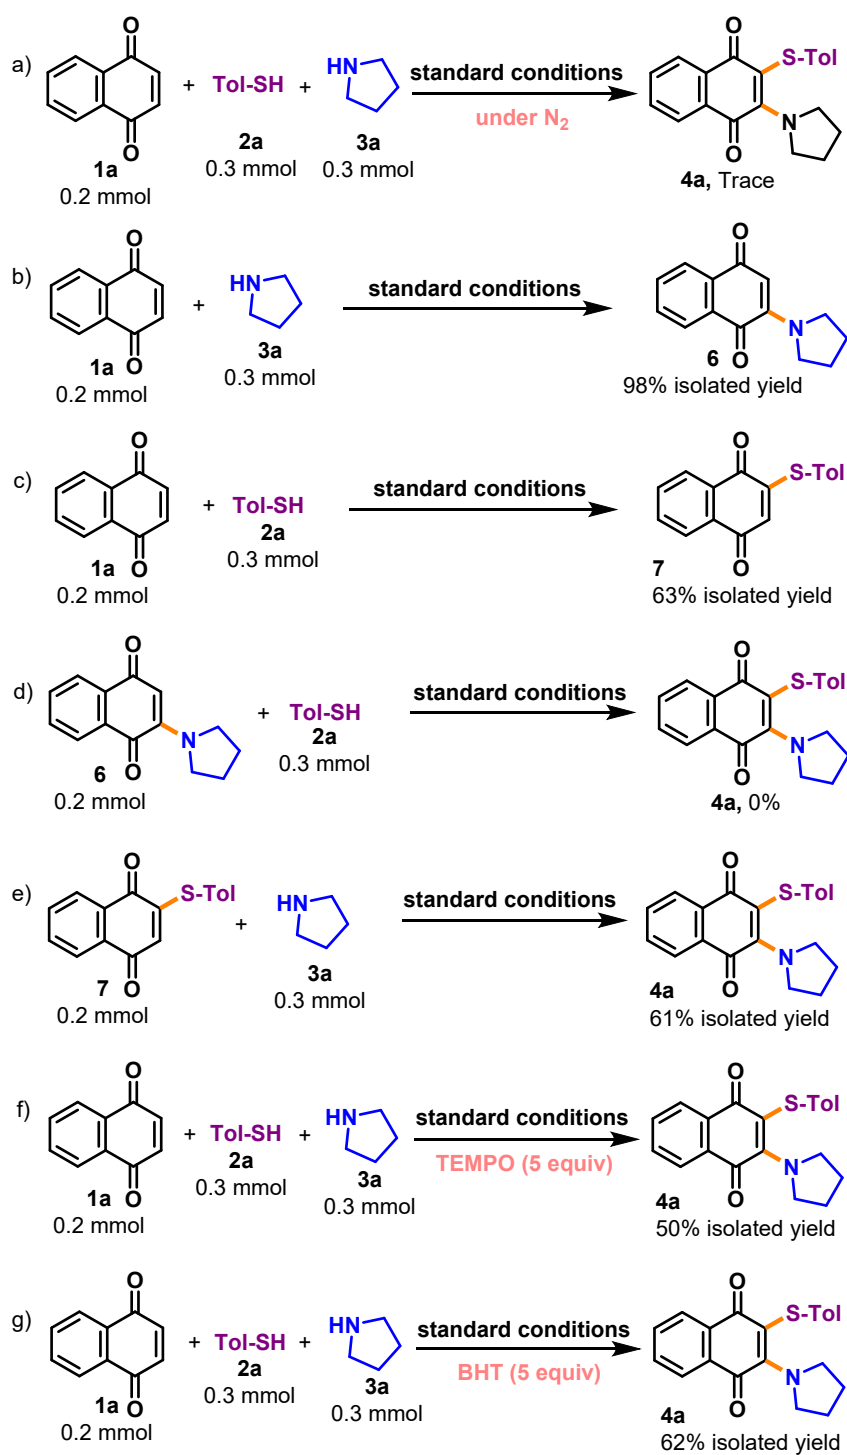

Scheme S2. Control Experiments

## 2.7 The calculation of green chemistry metrics

| Entry                          | This work | Previous work (Ref 13) |
|--------------------------------|-----------|------------------------|
| AU (Atom Utilization)          | 0.63      | 0.63                   |
| E-factor                       | 1.53      | 1.86                   |
| RME (Reaction Mass Efficiency) | 0.39      | 0.35                   |
| MI (Mass Intensity)            | 38.53     | 88.29                  |

**Table S1** Green metrics of this work

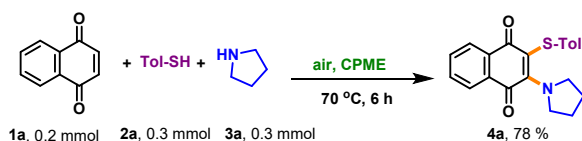

| Item | Reactant 1 | Reactant 2 | Reactant 3 | Product    |
|------|------------|------------|------------|------------|
|      | 1a         | 2a         | 3a         | 4a         |
| Mmol | 0.2 mmol   | 0.3 mmol   | 0.3 mmol   | 0.156 mmol |
| MW   | 158.04     | 124.03     | 71.07      | 226.09     |
| Mass | 31.61 mg   | 37.21 mg   | 21.32 mg   | 35.27 mg   |

$$A U (a t o m \ u t i l i z a t i o n) = \frac{M W \ o f \ d e s i r e d \ p r o d u c t s}{M W \ R e a c t a n t \ 1 + M W \ R e a c t a n t \ 2 + M W \ R e a c t a n t \ 3}$$

$$= \frac{226.09}{158.04 + 124.03 + 71.07}$$

$$= 0.63$$

$$E - f a c t o r = \frac{\sum M W \ o f \ s t o i c h i o m e t r i c \ r e a c t a n t s}{\sum M W \ o f \ d e s i r e d \ p r o d u c t s}$$

$$= \frac{31.61 + 37.21 + 21.32}{35.27}$$

$$= 1.54$$

$$R M E (r e a c t i o n \ m a s s \ e f f i c i e n c y) = \frac{\sum M W \ o f \ d e s i r e d \ p r o d u c t s}{\sum M W \ o f \ s t o i c h i o m e t r i c \ r e a c t a n t s}$$

$$= \frac{35.27}{31.61 + 37.21 + 21.32}$$

$$= 0.39$$

$$M (m a s s \ i n t e n s i t y) = \frac{\sum M W \ o f \ a l l \ s u b s t a n c e s \ (e x c l u d i n g \ s o l v e n t \ a n d \ c a t a l y s t)}{\sum M W \ o f \ d e s i r e d \ p r o d u c t s}$$

$$= \frac{31.61 + 37.21 + 21.32 + 10.14}{35.27}$$

$$= 3.853$$

**Table S2** Green metrics of the previous work

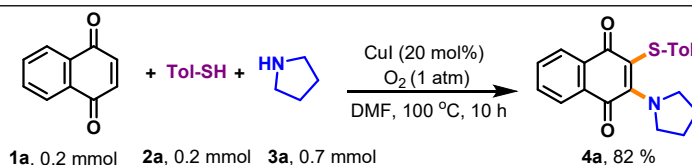

| Item | Reactant 1 | Reactant 1 | Reactant 1 | Product    |
|------|------------|------------|------------|------------|
|      | 1a         | 2a         | 3a         | 4a         |
| Mmol | 0.2 mmol   | 0.2 mmol   | 0.7 mmol   | 0.164 mmol |
| MW   | 158.04     | 124.03     | 71.07      | 226.09     |
| Mass | 31.61 mg   | 24.81 mg   | 49.75 mg   | 37.08 mg   |

$$\begin{aligned}
 \text{Atom Utilization} &= \frac{\sum \text{MW of desired products}}{\sum \text{MW Reactant}} \\
 &= \frac{226.09}{158.04 + 124.07 + 71.07} \\
 &= 0.63 \\
 \text{E-factor} &= \frac{\sum \text{MW of stoichiometric reagents}}{\sum \text{MW of desired products}} \\
 &= \frac{31.6 + 24.8 + 19.75}{37.08} \\
 &= 1.86 \\
 \text{Reaction mass efficiency} &= \frac{\sum \text{MW of desired products}}{\sum \text{MW of stoichiometric reactants}} \\
 &= \frac{37.08}{31.6 + 24.8 + 19.75} \\
 &= 0.35 \\
 \text{Intensity} &= \frac{\sum \text{MW of all substances (excluding O}_2\text{)}}{\sum \text{MW of desired products}} \\
 &= \frac{31.6 + 24.8 + 19.75 + 90.45 + 0.2 \times 0.2 + 0.0 \times 0.9 + 100 + 1.2}{37.08} \\
 &= 88.29
 \end{aligned}$$

(The weight of O<sub>2</sub> balloon is approximately 1.28 g)

## 2.8 Byproduct analysis

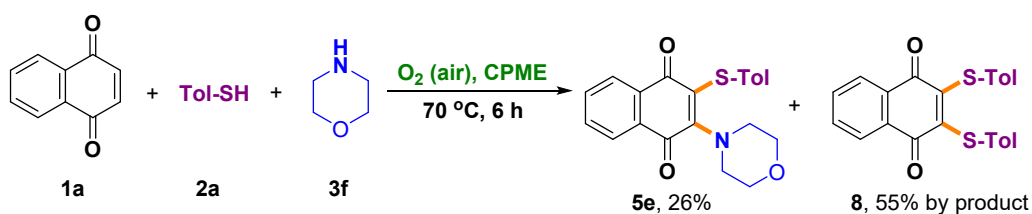

Experimental procedure: To 25 mL reaction tube, 1,4-naphthoquinone **1a** (0.2 mmol), *p*-methylthiophenol **2a** (0.3 mmol) and morpholine **3f** (0.3 mmol), CPME (1.5 mL) were added, and then the reaction tube was stirred in air at 70 °C for 6 h. After the reaction, the mixture was collected, and the residue was purified by silica gel column chromatography to obtain the desired product **5e** and byproduct **8** with yields of 26% and 55%, respectively.

## 3. Characterization data

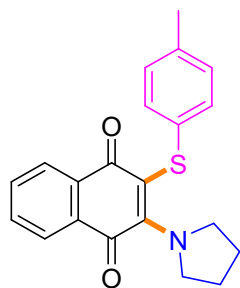

**2-(pyrrolidin-1-yl)-3-(p-tolylthio)naphthalene-1,4-dione (4a)<sup>1</sup>**

Reddish brown solid, 75% yield (52 mg). <sup>1</sup>H NMR (400 MHz, Chloroform-*d*) δ 8.10 (dd, *J* = 7.6, 1.3 Hz, 1H), 7.93 (dd, *J* = 7.6, 1.3 Hz, 1H), 7.69 (td, *J* = 7.6, 1.5 Hz, 1H), 7.60 (td, *J* = 7.5, 1.3 Hz, 1H), 7.07 (d, *J* = 8.3 Hz, 2H), 7.03 (d, *J* = 8.3 Hz, 2H), 3.95 – 3.84 (m, 4H), 2.28 (s, 3H), 1.87 – 1.75 (m, 4H). <sup>13</sup>C NMR (101 MHz, Chloroform-*d*) δ 184.39, 180.29, 155.61, 135.06, 134.78, 134.09, 133.48, 131.96, 131.90, 129.59, 126.40, 126.25, 125.90, 105.66, 53.82, 25.50, 20.93.

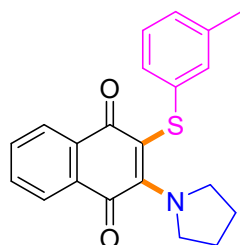

**2-(pyrrolidin-1-yl)-3-(m-tolylthio)naphthalene-1,4-dione (4b)**

Reddish brown solid, 58% yield (41 mg), mp 50.8 – 51.2 °C. <sup>1</sup>H NMR (400 MHz, Chloroform-*d*) δ 8.12 – 8.04 (m, 1H), 7.92 (dd, *J* = 7.6, 1.3 Hz, 1H), 7.67 (td, *J* = 7.5, 1.4 Hz, 1H), 7.59 (td, *J* = 7.5, 1.4 Hz, 1H), 7.08 (t, *J* = 7.6 Hz, 1H), 6.97 (d, *J* = 1.7 Hz, 1H), 6.95 – 6.90 (m, 1H), 6.87 (d, *J* = 7.5 Hz, 1H), 3.96 – 3.82 (m, 4H), 2.26 (s, 3H), 1.87 – 1.71 (m, 4H). <sup>13</sup>C NMR (101 MHz, Chloroform-*d*) δ 184.44, 180.23, 155.89, 138.51, 134.12, 133.48, 131.98, 131.91, 128.68, 126.48, 126.42, 125.92, 125.88, 122.98, 104.85, 53.87, 25.50, 21.47. HRMS Calcd for C<sub>27</sub>H<sub>20</sub>NO<sub>2</sub>S [M + H]<sup>+</sup>: m/z 350.1209, found: 350.1213.

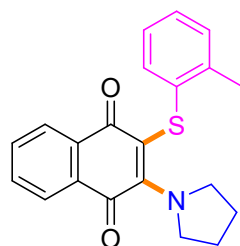

**2-(pyrrolidin-1-yl)-3-(o-tolylthio)naphthalene-1,4-dione (4c)**

Reddish brown solid, 56% yield (39 mg), mp 80.8 – 81.0 °C. <sup>1</sup>H NMR (400 MHz, Chloroform-*d*) δ 8.09 (dd, *J* = 7.8, 1.3 Hz, 1H), 7.93 (dd, *J* = 7.8, 1.3 Hz, 1H), 7.68 (td, *J* = 7.6, 1.4 Hz, 1H), 7.60 (td, *J* = 7.5, 1.3 Hz, 1H), 7.11 (dd, *J* = 7.1, 1.7 Hz, 1H), 7.06 – 6.94 (m, 2H), 6.87 (dd, *J* = 7.6, 1.6 Hz, 1H), 3.95 – 3.82 (m, 4H), 2.45 (s, 3H), 1.85 – 1.75 (m, 4H). <sup>13</sup>C NMR (101 MHz, Chloroform-*d*) δ 184.44, 180.18, 156.55, 137.67, 134.43, 134.15, 133.52, 132.02, 131.91, 130.07, 126.44, 126.34, 125.94, 125.20, 124.52, 103.82, 53.78, 25.49, 20.02. HRMS Calcd for C<sub>27</sub>H<sub>20</sub>NO<sub>2</sub>S [M + H]<sup>+</sup>: m/z 350.1209, found: 350.1208.

[1] F.L. Zeng, X. Chen, S.Q. He, *et al.*, *Org. Chem. Front.* 6 (2019) 1476–1480.



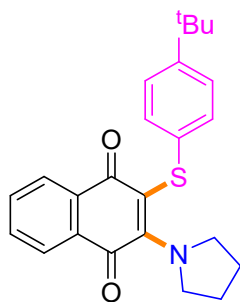

2-((4-(tert-butyl)phenyl)thio)-3-(pyrrolidin-1-yl)naphthalene-1,4-dione (**4d**)<sup>1</sup>

Reddish brown solid, 71% yield (56 mg). <sup>1</sup>H NMR (400 MHz, Chloroform-*d*) δ 8.07 (d, *J* = 7.7 Hz, 1H), 7.91 (d, *J* = 7.6 Hz, 1H), 7.66 (t, *J* = 7.5 Hz, 1H), 7.57 (t, *J* = 7.5 Hz, 1H), 7.22 (d, *J* = 8.4 Hz, 2H), 7.07 (d, *J* = 8.4 Hz, 2H), 3.89 – 3.86 (m, 4H), 1.85 – 1.68 (m, 4H), 1.25 (s, 9H). <sup>13</sup>C NMR (101 MHz, Chloroform-*d*) δ 184.40, 180.29, 155.69, 148.03, 135.03, 134.07, 133.46, 131.95, 131.90, 126.36, 125.91, 125.89, 125.84, 105.52, 53.85, 34.33, 31.33, 25.48.

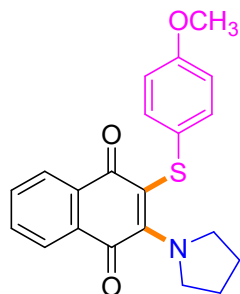

2-((4-methoxyphenyl)thio)-3-(pyrrolidin-1-yl)naphthalene-1,4-dione (**4e**)<sup>1</sup>

Reddish brown solid, 65% yield (47 mg). <sup>1</sup>H NMR (400 MHz, Chloroform-*d*) δ 8.08 (dd, *J* = 7.6, 1.3 Hz, 1H), 7.90 (dd, *J* = 7.6, 1.4 Hz, 1H), 7.66 (td, *J* = 7.5, 1.4 Hz, 1H), 7.58 (td, *J* = 7.5, 1.3 Hz, 1H), 7.16 – 7.08 (m, 2H), 6.81 – 6.72 (m, 2H), 3.91 – 3.82 (m, 4H), 3.74 (s, 3H), 1.85 – 1.74 (m, 4H). <sup>13</sup>C NMR (101 MHz, Chloroform-*d*) δ 184.35, 180.43, 157.80, 155.15, 134.05, 133.43, 131.90, 129.11, 128.42, 126.34, 125.88, 114.58, 107.21, 55.35, 53.83, 25.52.

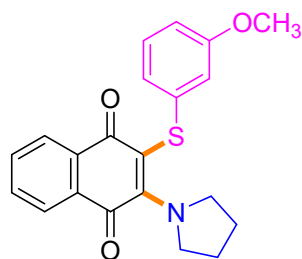

2-((3-methoxyphenyl)thio)-3-(pyrrolidin-1-yl)naphthalene-1,4-dione (**4f**)

Reddish brown solid, 54% yield (39 mg), mp 38.8 – 39.2 °C. <sup>1</sup>H NMR (400 MHz, Chloroform-*d*) δ 8.07 (dd, *J* = 7.6, 1.2 Hz, 1H), 7.89 (dd, *J* = 7.6, 1.2 Hz, 1H), 7.66 (td, *J* = 7.4, 1.4 Hz, 1H), 7.57 (td, *J* = 7.6, 1.4 Hz, 1H), 7.11 (t, *J* = 8.0 Hz, 1H), 6.78 – 6.67 (m, 2H), 6.61 (dd, *J* = 8.1, 2.4 Hz, 1H), 3.97 – 3.82 (m, 4H), 3.71 (s, 3H), 1.90 – 1.71 (m, 4H). <sup>13</sup>C NMR (101 MHz, Chloroform-*d*) δ 184.39, 180.10, 159.88, 156.11, 140.32, 134.12, 133.43, 131.96, 131.92, 129.65, 126.36, 125.91, 118.18, 111.41, 110.57, 104.16, 55.20, 53.88, 25.47. HRMS Calcd for C<sub>21</sub>H<sub>20</sub>NO<sub>3</sub>S [M + H]<sup>+</sup>: *m/z* 366.1158, found: 366.1160.

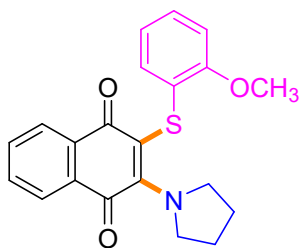

2-((2-methoxyphenyl)thio)-3-(pyrrolidin-1-yl)naphthalene-1,4-dione (**4g**)<sup>1</sup>

Reddish brown solid, 76% yield (55 mg). <sup>1</sup>H NMR (400 MHz, Chloroform-*d*) δ 8.08 (dd, *J* = 7.6, 1.3 Hz, 1H), 7.92 (dd, *J* = 7.8, 1.3 Hz, 1H), 7.67 (td, *J* = 7.6, 1.4 Hz, 1H), 7.59 (td, *J* = 7.5, 1.3 Hz, 1H), 7.08 – 7.03 (m, 1H), 6.90 – 6.78 (m, 3H), 3.92 – 3.89 (m, 7H), 1.85 – 1.74 (m, 4H). <sup>13</sup>C NMR (101 MHz, Chloroform-*d*) δ 184.50, 180.09, 156.73, 155.51, 134.11, 133.59, 132.03, 131.85, 127.10, 126.42, 126.37, 125.90, 125.61, 121.16, 110.36, 103.00, 55.87, 53.80, 25.50.

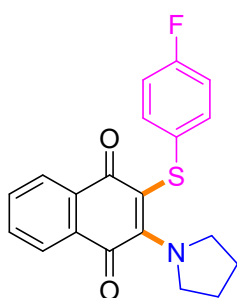

2-((4-fluorophenyl)thio)-3-(pyrrolidin-1-yl)naphthalene-1,4-dione (**4h**)<sup>1</sup>

Reddish brown solid, 60% yield (42 mg). <sup>1</sup>H NMR (400 MHz, Chloroform-*d*) δ 8.07 (dd, *J* = 7.5, 1.2 Hz, 1H), 7.91 (dd, *J* = 7.6, 1.3 Hz, 1H), 7.68 (td, *J* = 7.5, 1.4 Hz, 1H), 7.59 (td, *J* = 7.5, 1.3 Hz, 1H), 7.18 – 7.08 (m, 2H), 6.97 – 6.87 (m, 2H), 3.95 – 3.83 (m, 4H), 1.88 – 1.77 (m, 4H). <sup>13</sup>C NMR (101 MHz, Chloroform-*d*) δ 184.33, 180.21, 162.03, 159.60, 156.04, 134.20, 133.88, 133.84, 133.35, 132.01, 131.89, 127.92, 127.85, 126.38, 125.97, 116.02, 115.80, 105.03, 54.03, 25.50. <sup>19</sup>F NMR (376 MHz, Chloroform-*d*) δ -117.70.

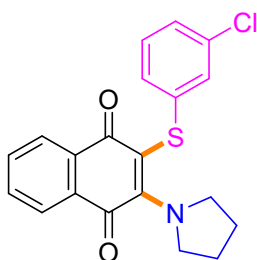

2-((3-chlorophenyl)thio)-3-(pyrrolidin-1-yl)naphthalene-1,4-dione (**4i**)<sup>1</sup>

Reddish brown solid, 55% yield (41 mg). <sup>1</sup>H NMR (400 MHz, Chloroform-*d*) δ 8.08 (t, *J* = 8.6 Hz, 1H), 7.92 (t, *J* = 8.7 Hz, 1H), 7.72 – 7.66 (m, 1H), 7.61 (t, *J* = 8.6 Hz, 1H), 7.19 – 6.89 (m, 4H), 4.00 – 3.68 (m, 4H), 1.94 – 1.55 (m, 4H). <sup>13</sup>C NMR (101 MHz, Chloroform-*d*) δ 184.25, 179.98, 156.49, 141.32, 134.69, 134.25, 133.33, 132.05, 131.95, 129.85, 126.43, 126.05, 125.41, 124.98, 123.84, 103.00, 54.09, 25.47.

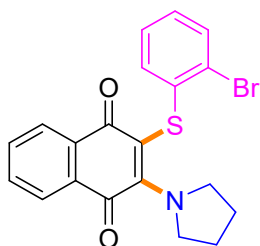

2-((2-bromophenyl)thio)-3-(pyrrolidin-1-yl)naphthalene-1,4-dione (**4j**)<sup>1</sup>

Reddish brown solid, 63% yield (52 mg). <sup>1</sup>H NMR (400 MHz, Chloroform-*d*) δ 8.11 (dd, *J* = 7.7, 1.3 Hz, 1H), 7.95 (dd, *J* = 7.8, 1.3 Hz, 1H), 7.71 (td, *J* = 7.6, 1.4 Hz, 1H), 7.63 (td, *J* = 7.5, 1.3 Hz, 1H), 7.49 (dd, *J* = 7.9, 1.3 Hz, 1H), 7.14 (td, *J* = 7.6, 1.4 Hz, 1H), 6.97 – 6.91 (m, 2H), 3.94 – 3.90 (m, 4H), 1.91 – 1.77 (m, 4H). <sup>13</sup>C NMR (101 MHz, Chloroform-*d*) δ 184.41, 179.90, 157.05, 139.95, 134.31, 133.43, 132.72, 132.03, 132.00, 127.67, 126.92, 126.49, 126.05, 125.82, 120.24, 102.74, 54.06, 25.49.

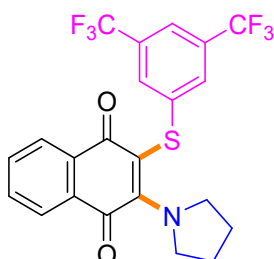

2-((3,5-bis(trifluoromethyl)phenyl)thio)-3-(pyrrolidin-1-yl)naphthalene-1,4-dione (**4k**)

Reddish brown solid, 49% yield (46 mg), mp 169.1 – 169.9 °C. <sup>1</sup>H NMR (400 MHz, Chloroform-*d*) δ 8.06 (d, *J* = 7.6 Hz, 1H), 7.94 (d, *J* = 7.6 Hz, 1H), 7.71 (t, *J* = 7.6 Hz, 1H), 7.63 (t, *J* = 7.6 Hz, 1H), 7.54 (d, *J* = 6.7 Hz, 3H), 3.94 – 3.91 (m, 4H), 1.96 – 1.78 (m, 4H). <sup>13</sup>C NMR (101 MHz, Chloroform-*d*) δ 183.92, 179.62, 156.93, 142.98, 134.44, 133.15, 132.39, 132.25, 132.06, 131.88, 131.73, 131.40, 126.40, 126.23, 125.18, 124.49, 121.78, 100.58, 54.27, 25.39. <sup>19</sup>F NMR (376 MHz, Chloroform-*d*) δ -63.02. HRMS Calcd for C<sub>22</sub>H<sub>16</sub>F<sub>6</sub>NO<sub>2</sub>S [M + H]<sup>+</sup>: m/z 472.0800, found: 472.0803.

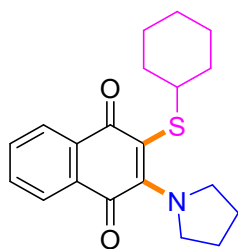

2-(cyclohexylthio)-3-(pyrrolidin-1-yl)naphthalene-1,4-dione (**4l**)<sup>1</sup>

Purple solid, 22% yield (15 mg). <sup>1</sup>H NMR (400 MHz, Chloroform-*d*) δ 8.08 (dd, *J* = 7.6, 1.3 Hz, 1H), 7.87 (dd, *J* = 7.6, 1.3 Hz, 1H), 7.66 (td, *J* = 7.6, 1.4 Hz, 1H), 7.57 (td, *J* = 7.5, 1.3 Hz, 1H), 3.96 – 3.85 (m, 4H), 2.90 – 2.83 (m, 1H), 1.98 – 1.90 (m, 4H), 1.90 – 1.82 (m, 2H), 1.73 – 1.68 (m, 2H), 1.61 – 1.52 (m, 1H), 1.31 – 1.15 (m, 5H). <sup>13</sup>C NMR (101 MHz, Chloroform-*d*) δ 184.58, 181.00, 156.28, 133.85, 133.56, 131.90, 131.69, 126.14, 125.60, 108.36, 54.37, 46.05, 32.85, 26.10, 25.90, 25.65.

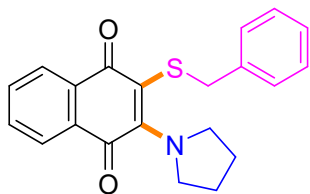

2-(benzylthio)-3-(pyrrolidin-1-yl)naphthalene-1,4-dione (**4m**)<sup>1</sup>

Purple solid, 62% yield (43 mg). <sup>1</sup>H NMR (400 MHz, Chloroform-*d*) δ 8.09 (dd, *J* = 7.6, 1.3 Hz, 1H), 7.82 (dd, *J* = 7.6, 1.3 Hz, 1H), 7.66 (td, *J* = 7.6, 1.3 Hz, 1H), 7.55 (td, *J* = 7.6, 1.3 Hz, 1H), 7.24 – 7.17 (m, 2H), 7.14 (td, *J* = 6.3, 5.9, 1.6 Hz, 3H), 3.82 (s, 2H), 3.72 – 3.58 (m, 4H), 1.85 – 1.70 (m, 4H). <sup>13</sup>C NMR (101 MHz, Chloroform-*d*) δ 184.19, 180.65, 156.55, 138.24, 133.91, 133.70, 131.76, 131.65, 128.96, 128.17, 126.90, 126.04, 125.69, 106.61, 54.32, 40.13, 25.45.

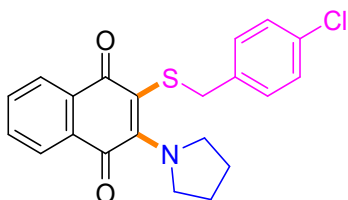

2-((4-chlorobenzyl)thio)-3-(pyrrolidin-1-yl)naphthalene-1,4-dione (**4n**)<sup>1</sup>

Purple solid, 64% yield (49 mg). <sup>1</sup>H NMR (400 MHz, Chloroform-*d*) δ 8.07 (dd, *J* = 7.4, 1.6 Hz, 1H), 7.95 (dd, *J* = 7.3, 1.6 Hz, 1H), 7.75 – 7.61 (m, 2H), 7.21 – 7.14 (m, 2H), 7.11 (d, *J* = 8.5 Hz, 2H), 4.09 (s, 2H), 3.59 – 3.44 (m, 4H), 2.78 – 2.60 (m, 4H). <sup>13</sup>C NMR (101 MHz, Chloroform-*d*) δ 181.96, 181.64, 156.45, 136.57, 133.83, 133.06, 132.93, 132.74, 131.94, 130.26, 128.50, 126.70, 126.34, 125.31, 55.05, 38.27, 28.04.

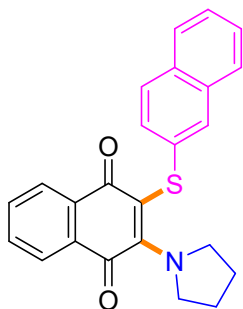

2-(naphthalen-2-ylthio)-3-(pyrrolidin-1-yl)naphthalene-1,4-dione (**4o**)

Reddish brown solid, 55% yield (42 mg), mp 49.6 – 50.7 °C. <sup>1</sup>H NMR (400 MHz, Chloroform-*d*) δ 8.13 (dd, *J* = 7.7, 1.4 Hz, 1H), 7.97 (dd, *J* = 7.6, 1.4 Hz, 1H), 7.75 – 7.68 (m, 3H), 7.67 – 7.59 (m, 2H), 7.48 (d, *J* = 1.8 Hz, 1H), 7.43 – 7.35 (m, 2H), 7.31 (dd, *J* = 8.6, 2.0 Hz, 1H), 4.02 – 3.82 (m, 4H), 1.88 – 1.66 (m, 4H). <sup>13</sup>C NMR (101 MHz, Chloroform-*d*) δ 184.38, 180.27, 155.99, 136.40, 134.20, 133.85, 133.48, 132.02, 131.37, 128.42, 127.72, 126.93, 126.46, 126.03, 125.18, 124.64, 123.64, 104.40, 53.91, 25.45. HRMS Calcd for C<sub>24</sub>H<sub>20</sub>NO<sub>2</sub>S [M + H]<sup>+</sup>: m/z 386.1209, found: 386.1210.

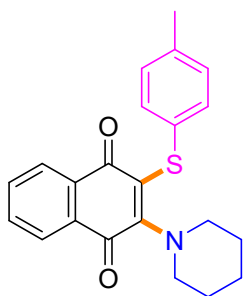

*2-(piperidin-1-yl)-3-(p-tolylthio)naphthalene-1,4-dione (5a)*<sup>1</sup>

Reddish brown solid, 81% yield (59 mg). <sup>1</sup>H NMR (400 MHz, Chloroform-*d*) δ 8.08 – 7.98 (m, 2H), 7.68 – 7.61 (m, 2H), 7.15 (d, *J* = 8.1 Hz, 2H), 7.03 (d, *J* = 8.0 Hz, 2H), 3.38 – 3.41 (m, 4H), 2.29 (s, 3H), 1.73 – 1.67 (m, 4H), 1.63 – 1.57 (m, 2H). <sup>13</sup>C NMR (101 MHz, Chloroform-*d*) δ 182.39, 181.71, 155.02, 135.94, 133.79, 133.20, 132.81, 132.66, 132.26, 129.64, 127.95, 126.65, 126.45, 120.01, 53.39, 26.87, 24.10, 21.06.

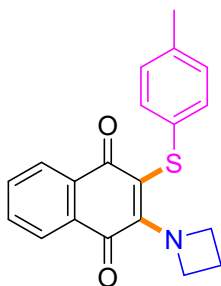

*2-(azetidin-1-yl)-3-(p-tolylthio)naphthalene-1,4-dione (5b)*

Reddish brown solid, 60% yield (40 mg), mp 68.5 – 69.7 °C. <sup>1</sup>H NMR (400 MHz, Chloroform-*d*) δ 8.11 (dd, *J* = 7.7, 1.3 Hz, 1H), 7.98 – 7.88 (m, 1H), 7.66 (td, *J* = 7.6, 1.5 Hz, 1H), 7.55 (td, *J* = 7.6, 1.4 Hz, 1H), 7.06 (d, *J* = 8.3 Hz, 2H), 7.00 (d, *J* = 8.4 Hz, 2H), 4.79 (t, *J* = 8.0 Hz, 4H), 2.34 – 2.26 (m, 2H), 2.24 (s, 3H). <sup>13</sup>C NMR (101 MHz, Chloroform-*d*) δ 182.70, 179.51, 151.22, 136.39, 134.59, 134.51, 133.58, 131.77, 131.30, 129.77, 126.59, 126.05, 125.92, 102.58, 58.77, 20.92, 18.31. HRMS Calcd for C<sub>20</sub>H<sub>18</sub>NO<sub>2</sub>S [M + H]<sup>+</sup>: m/z 336.1053, found: 336.1053.

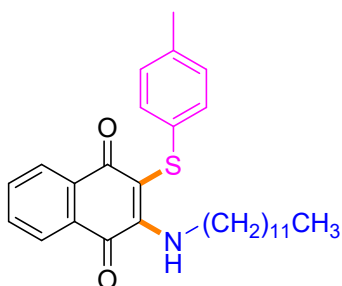

*2-(dodecylamino)-3-(p-tolylthio)naphthalene-1,4-dione (5c)*<sup>1</sup>

Reddish brown solid, 37% yield (34 mg). <sup>1</sup>H NMR (400 MHz, Chloroform-*d*) δ 8.15 (d, *J* = 7.6 Hz, 1H), 8.05 (d, *J* = 7.5 Hz, 1H), 7.71 (t, *J* = 7.5 Hz, 1H), 7.61 (t, *J* = 7.5 Hz, 1H), 7.12 (d, *J* = 8.1 Hz, 2H), 7.02 (d, *J* = 8.0 Hz, 2H), 3.89 – 3.83 (m, 2H), 2.26 (s, 3H), 1.59 (t, *J* = 7.2 Hz, 2H), 1.31 – 1.17 (m, 18H), 0.88 (t, *J* = 6.7 Hz, 3H). <sup>13</sup>C NMR (101 MHz, Chloroform-*d*) δ 181.59, 135.25, 134.97, 133.85, 132.13, 129.82, 127.15, 126.81, 126.60, 45.65, 31.93, 30.49, 29.65, 29.57, 29.49, 29.36, 29.20, 26.64, 22.71, 20.94, 14.15.

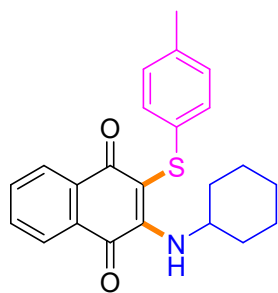

*2-(cyclohexylamino)-3-(p-tolylthio)naphthalene-1,4-dione (5d)*<sup>1</sup>

Reddish brown solid, 40% yield (30 mg). <sup>1</sup>H NMR (400 MHz, Chloroform-*d*) δ 8.14 (d, *J* = 7.1 Hz, 1H), 8.03 (d, *J* = 7.7 Hz, 1H), 7.69 (td, *J* = 7.5, 1.3 Hz, 1H), 7.59 (td, *J* = 7.5, 1.2 Hz, 1H), 7.14 (s, 2H), 7.02 (d, *J* = 8.1 Hz, 2H), 6.54 (d, *J* = 9.1 Hz, 1H), 4.60 (d, *J* = 10.8 Hz, 1H), 2.25 (s, 3H), 2.01 – 1.85 (m, 2H), 1.69 (dt, *J* = 13.0, 3.9 Hz, 2H), 1.62 – 1.57 (m, 1H), 1.40 – 1.15 (m, 5H). <sup>13</sup>C NMR (101 MHz, Chloroform-*d*) δ 181.60, 179.88, 135.33, 134.91, 133.81, 132.13, 130.47, 129.80, 127.06, 126.61, 52.91, 34.17, 25.33, 24.53, 20.98.

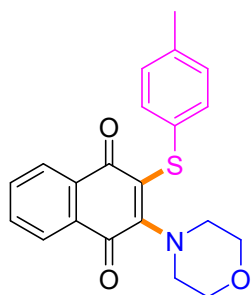

*2-morpholino-3-(p-tolylthio)naphthalene-1,4-dione (5e)*<sup>1</sup>

Reddish brown solid, 26% yield (19 mg). <sup>1</sup>H NMR (400 MHz, Chloroform-*d*) δ 8.12 – 8.07 (m, 1H), 8.07 – 8.02 (m, 1H), 7.75 – 7.64 (m, 2H), 7.22 – 7.15 (m, 2H), 7.07 (d, *J* = 8.1 Hz, 2H), 3.83 – 3.72 (m, 4H), 3.52 – 3.42 (m, 4H), 2.32 (s, 3H). <sup>13</sup>C NMR (101 MHz, Chloroform-*d*) δ 182.07, 181.90, 153.09, 136.48, 133.96, 132.97, 132.57, 132.19, 132.05, 129.79, 128.18, 126.74, 126.55, 122.13, 67.45, 51.81, 21.06.

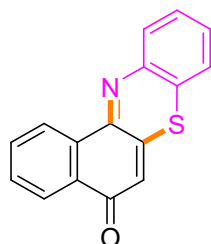

*5H-benzo[a]phenothiazin-5-one (5f)*<sup>1</sup>

Yellow solid, 92% yield (48 mg). <sup>1</sup>H NMR (400 MHz, Chloroform-*d*) δ 8.79 – 8.63 (m, 1H), 8.30 – 8.08 (m, 1H), 7.85 – 7.74 (m, 1H), 7.67 (td, *J* = 8.0, 7.1, 4.2 Hz, 2H), 7.40 – 7.26 (m, 3H), 6.71 (s, 1H). <sup>13</sup>C NMR (101 MHz, Chloroform-*d*) δ 180.16, 144.65, 138.53, 137.75, 134.16, 133.34, 132.56, 131.59, 131.27, 129.93, 127.71, 125.73, 125.57, 124.63, 122.88, 120.20.

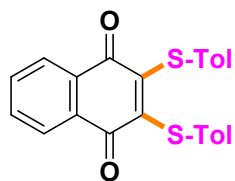

*2,3-bis(p-tolylthio)naphthalene-1,4-dione (8)*<sup>1</sup>

Reddish brown solid, 55% yield (44 mg). <sup>1</sup>H NMR (400 MHz, Chloroform-*d*)  $\delta$  7.99 (dd, *J* = 5.7, 3.3 Hz, 2H), 7.68 (dd, *J* = 5.8, 3.3 Hz, 2H), 7.32 (d, *J* = 8.2 Hz, 4H), 7.17 – 7.11 (m, 4H), 2.36 (s, 6H). <sup>13</sup>C NMR (101 MHz, Chloroform-*d*)  $\delta$  178.78, 148.32, 137.98, 133.68, 132.86, 131.43, 130.21, 129.95, 127.13, 21.27.

## 4. $^1\text{H}$ , $^{13}\text{C}$ , and $^{19}\text{F}$ NMR spectra

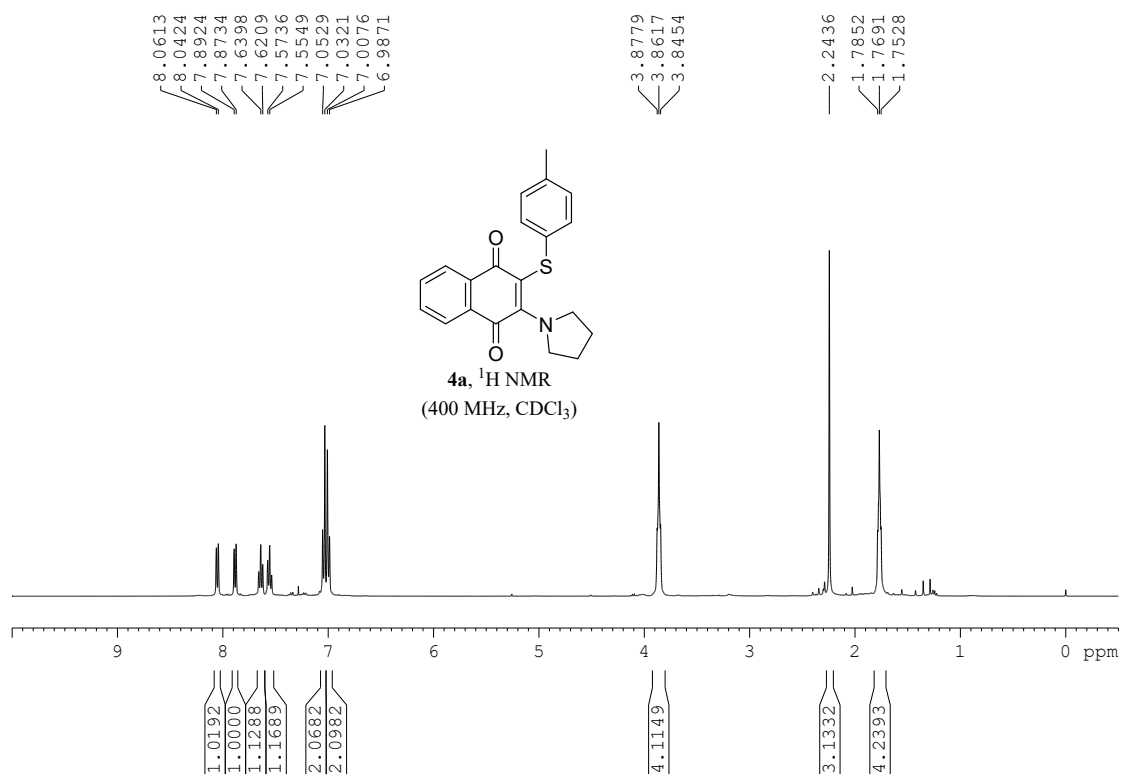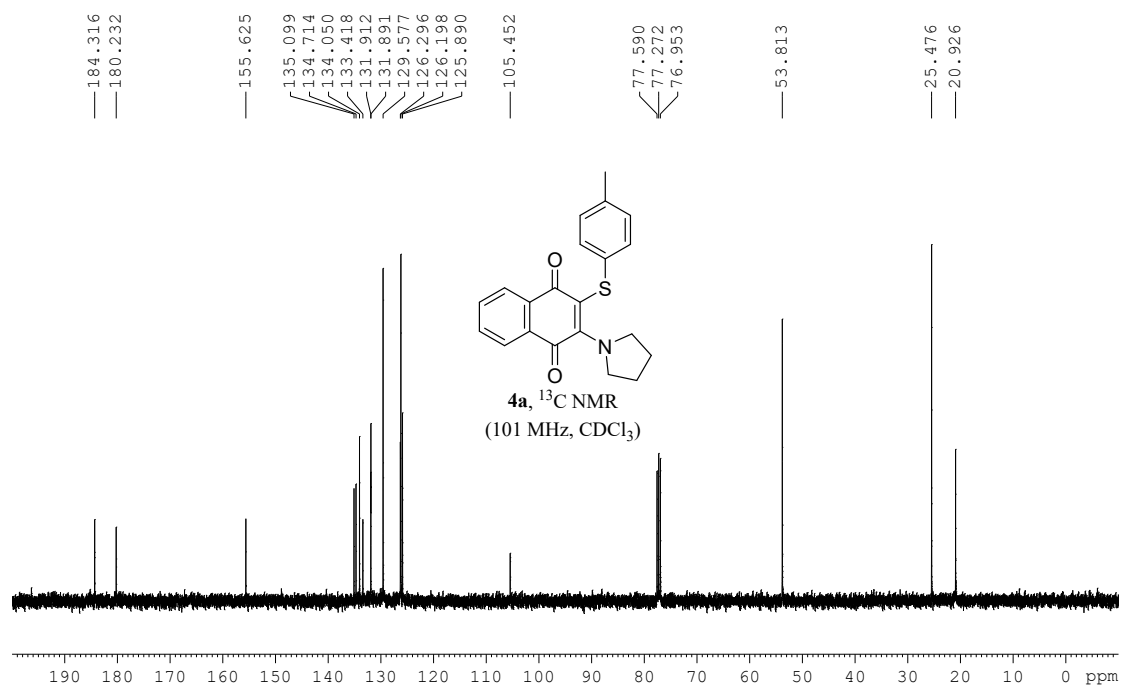



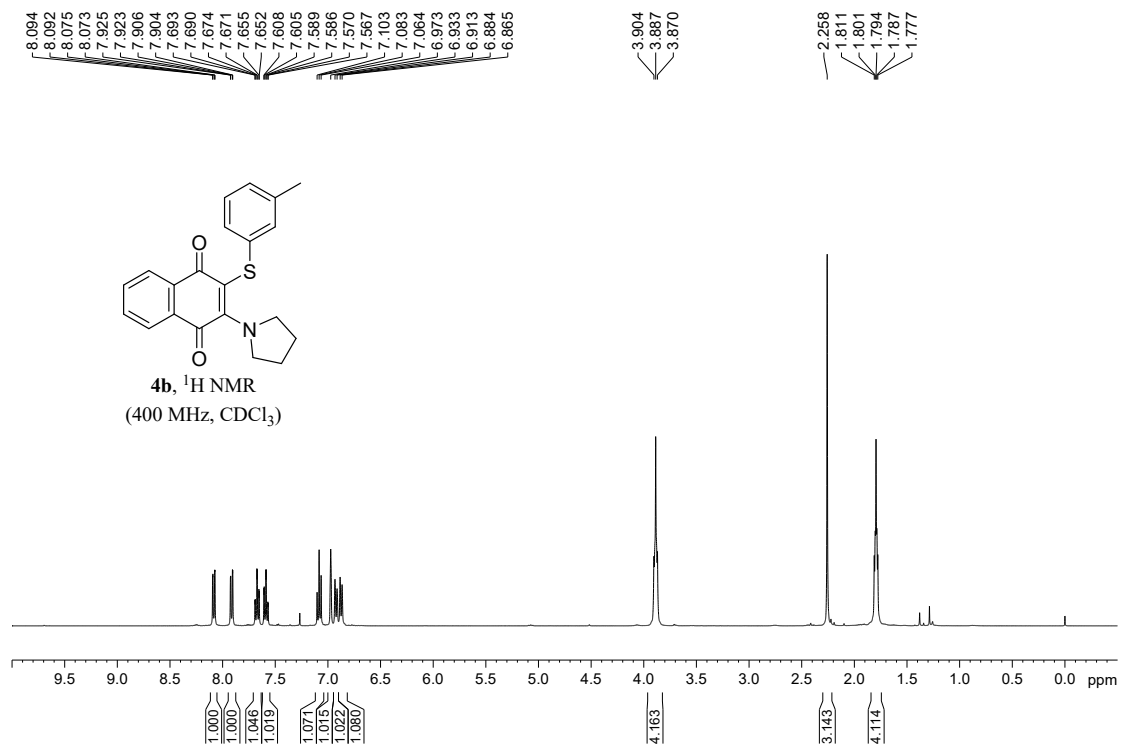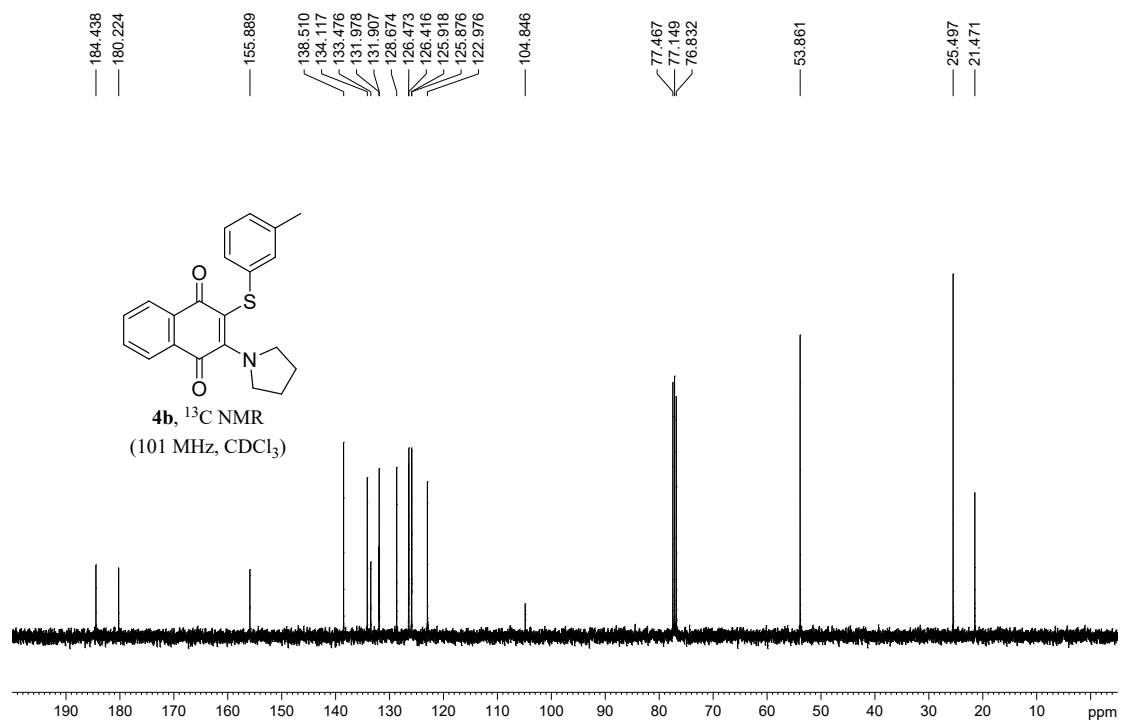

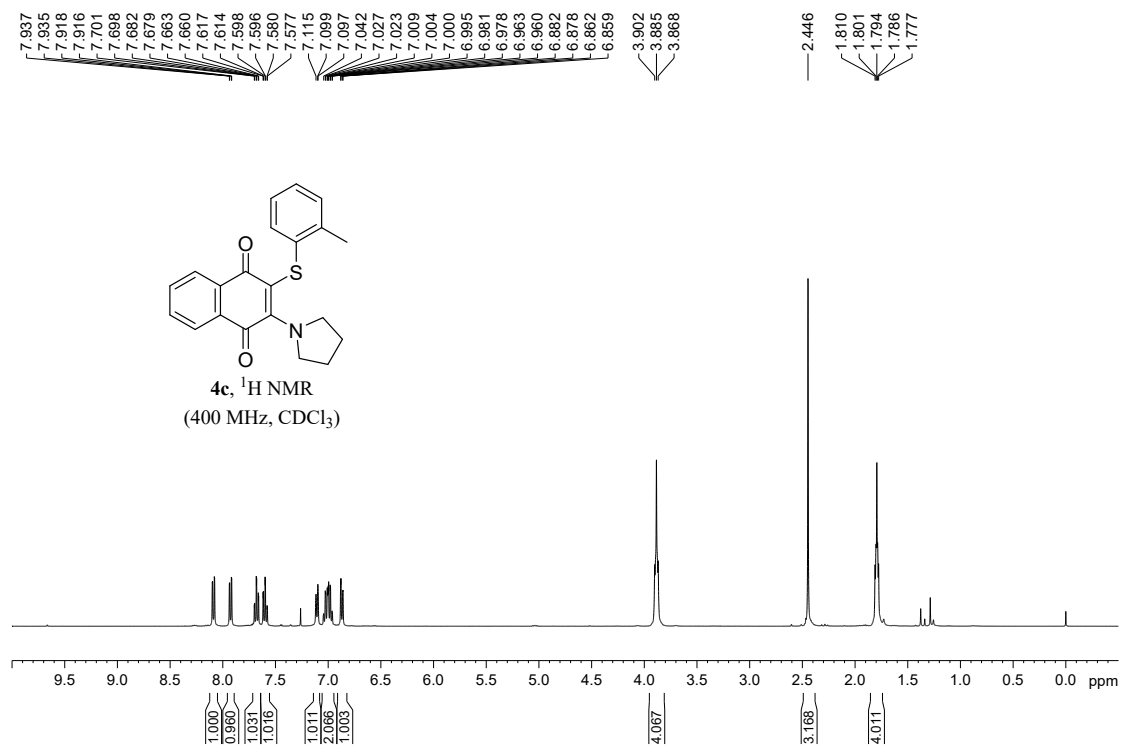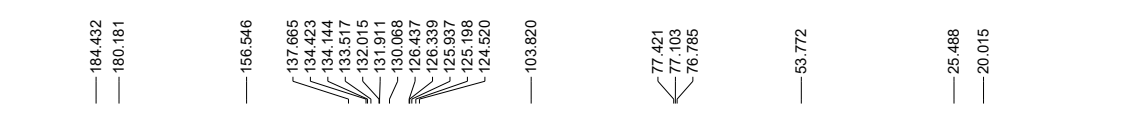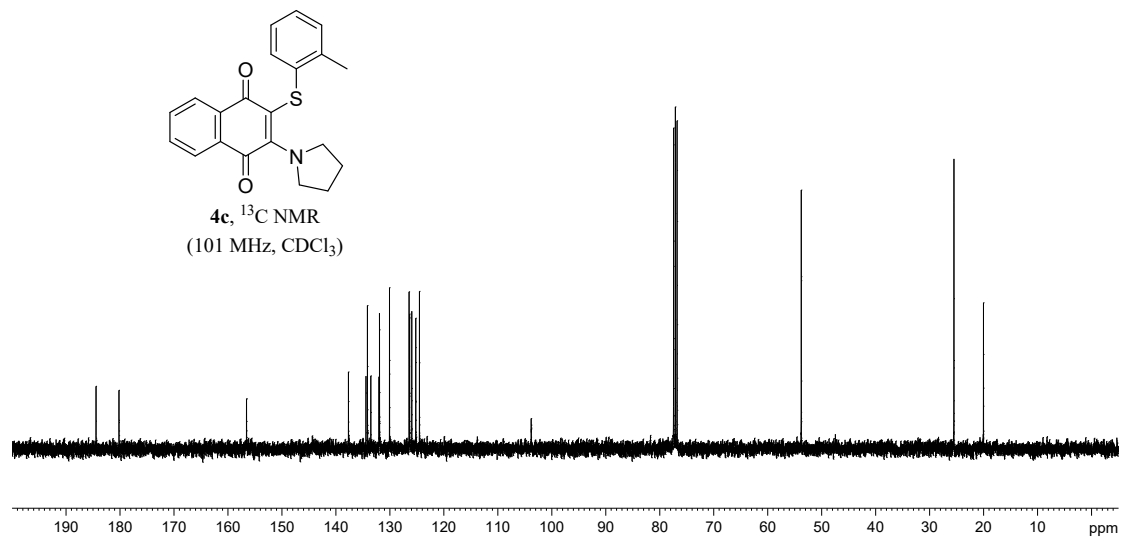

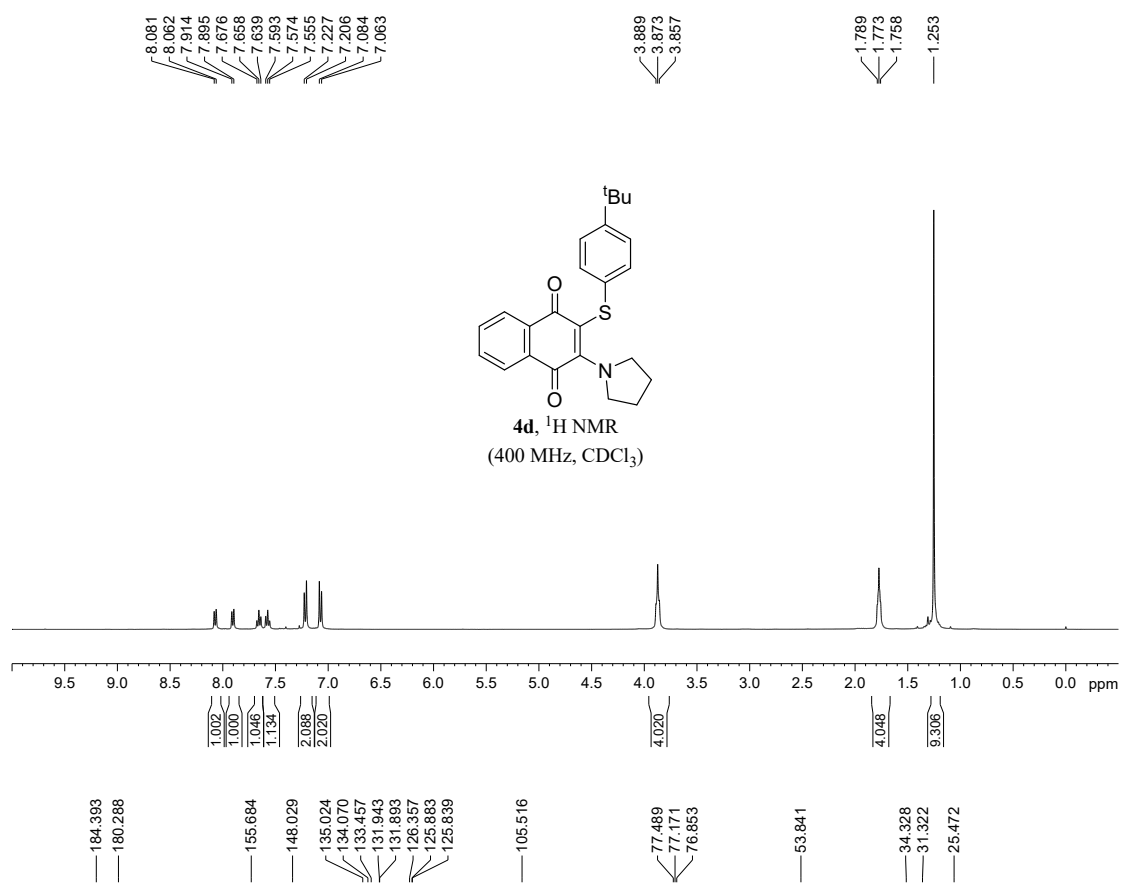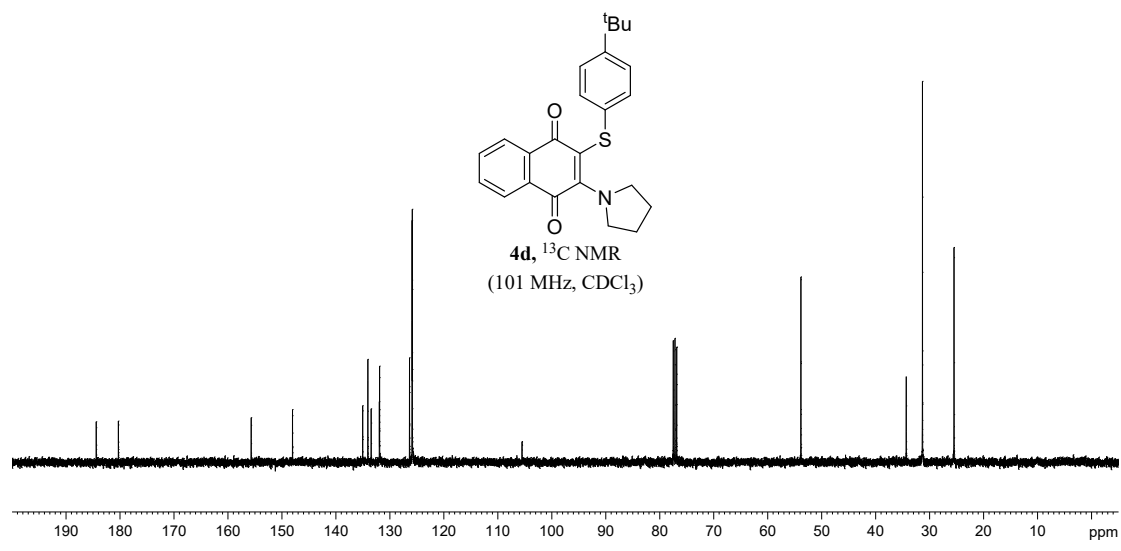

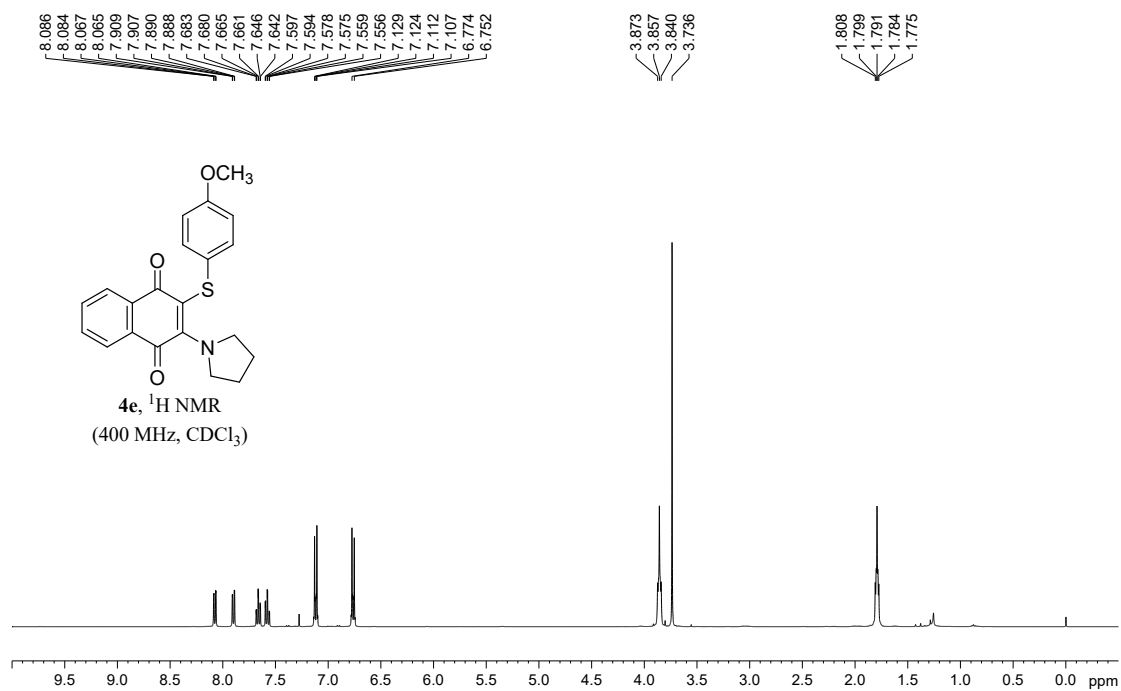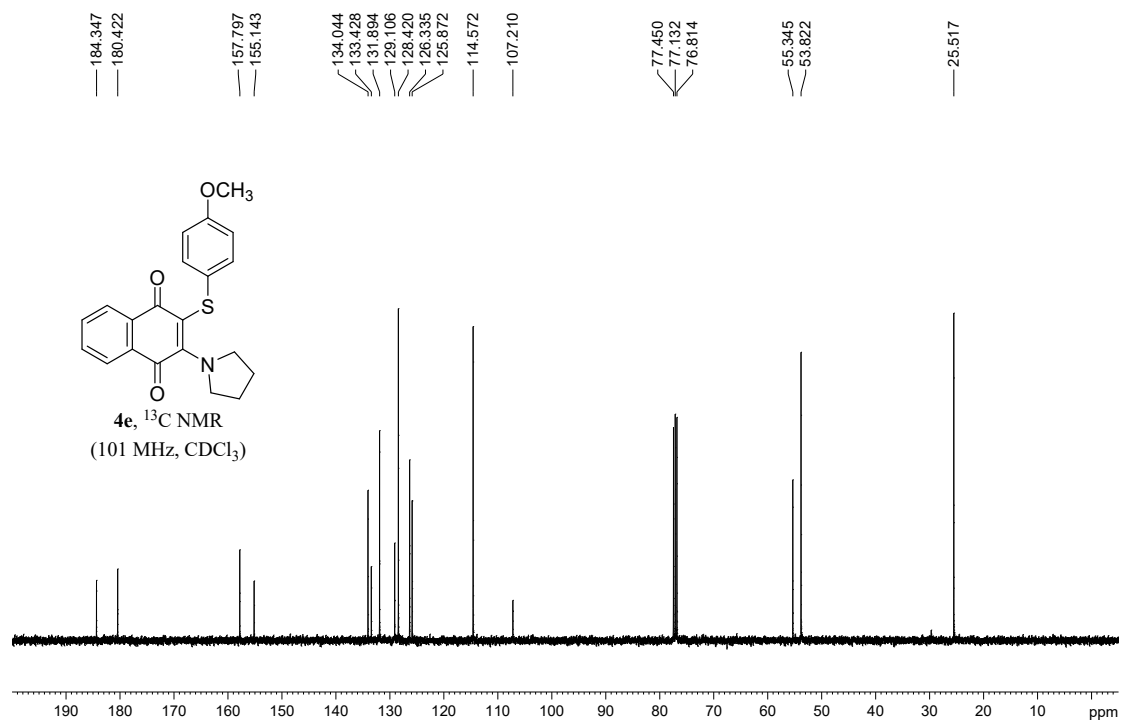

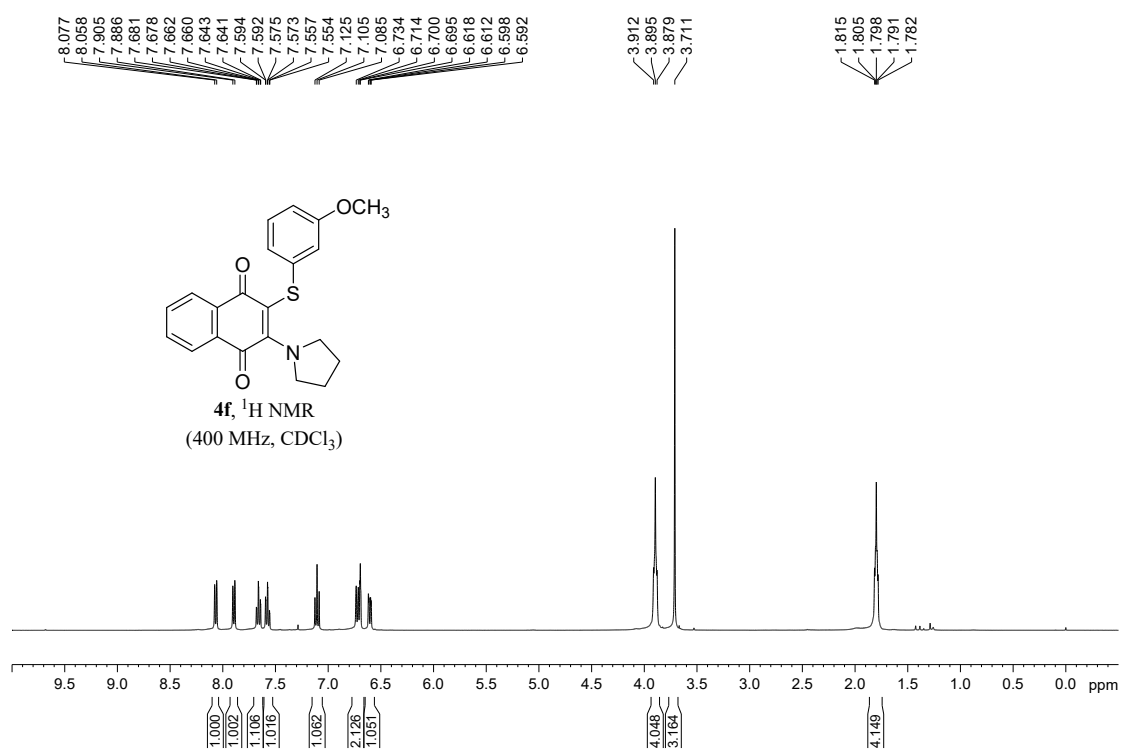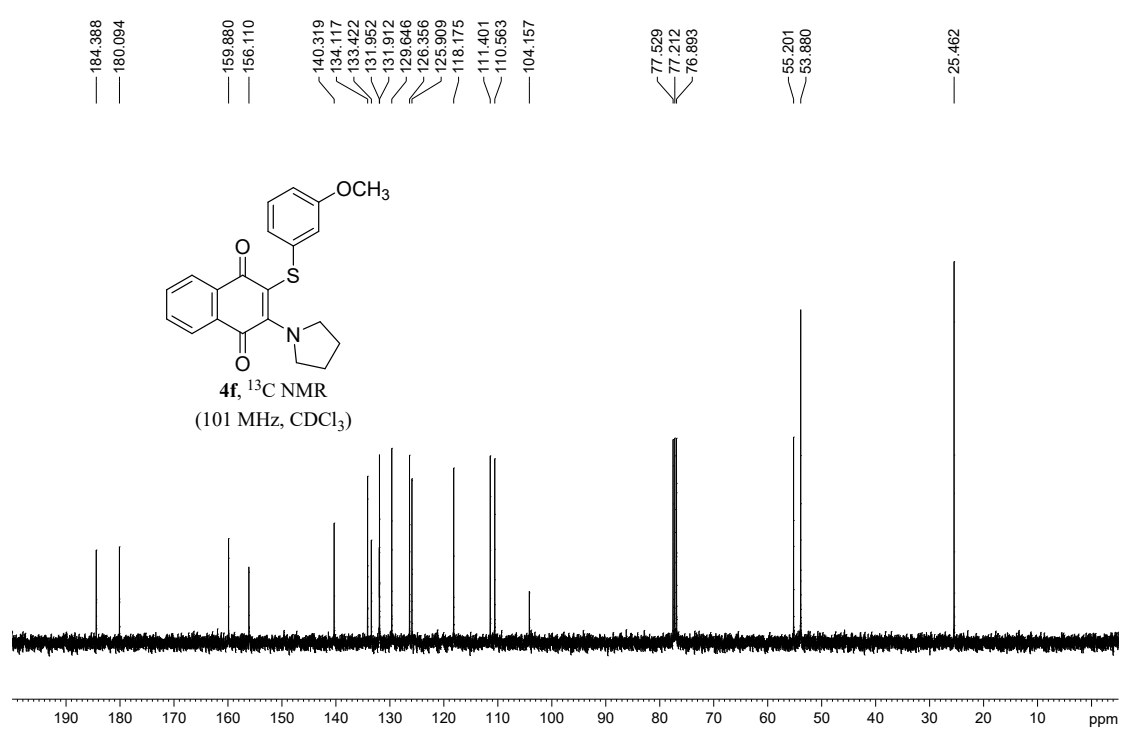

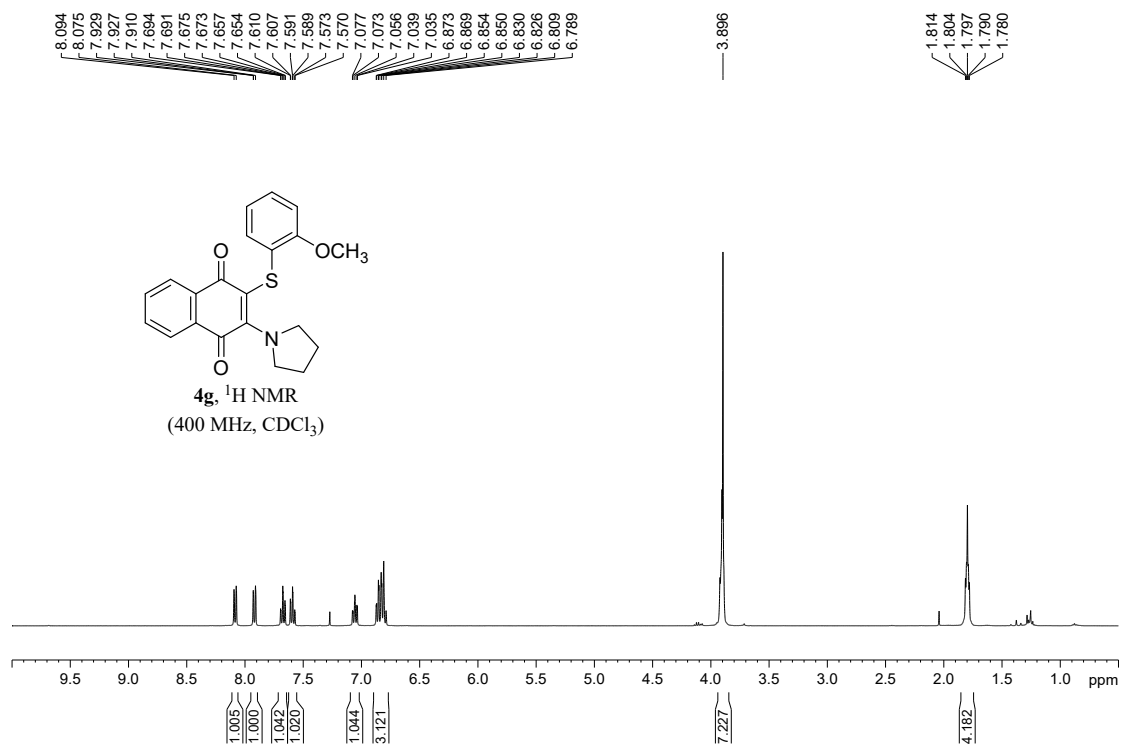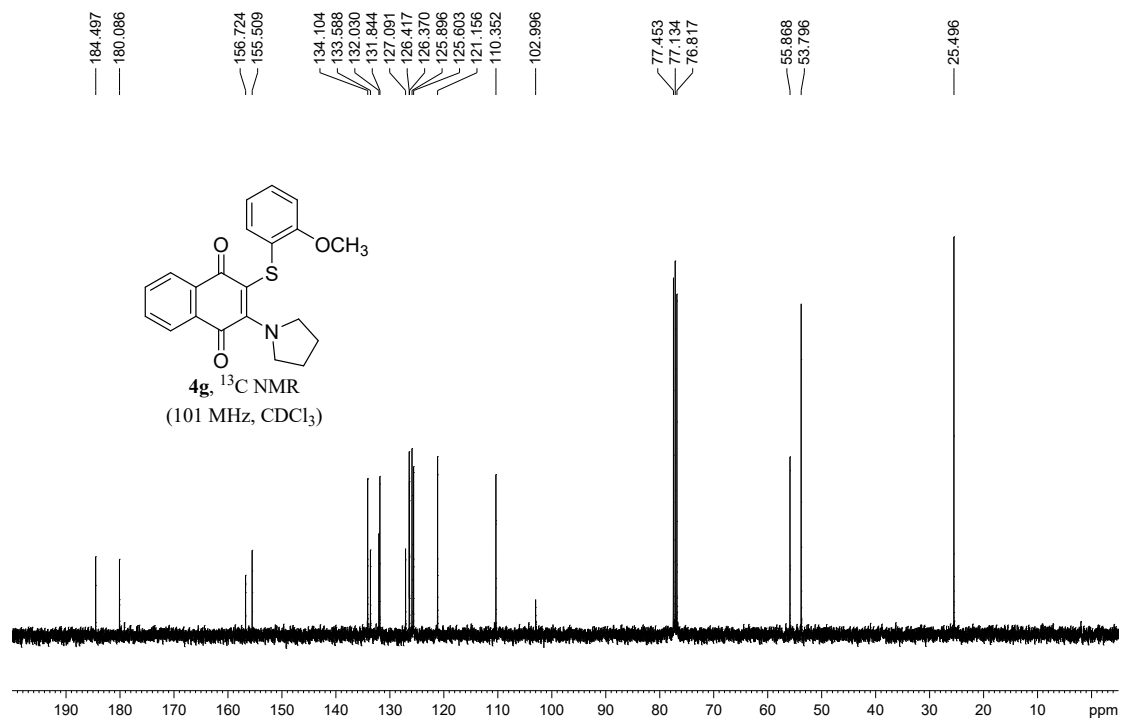

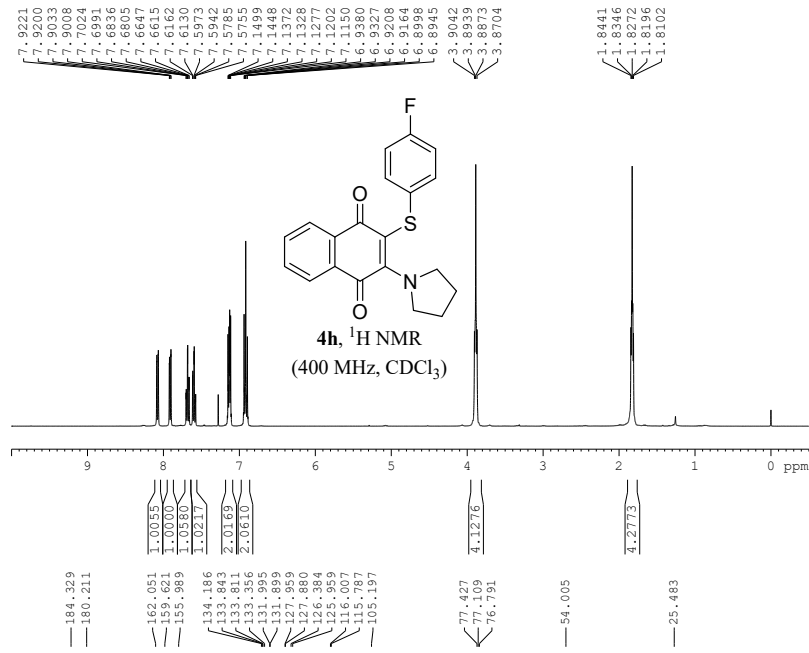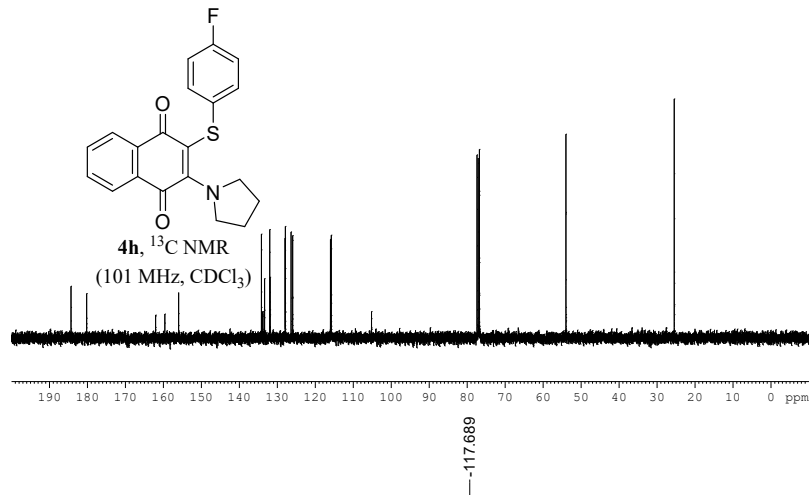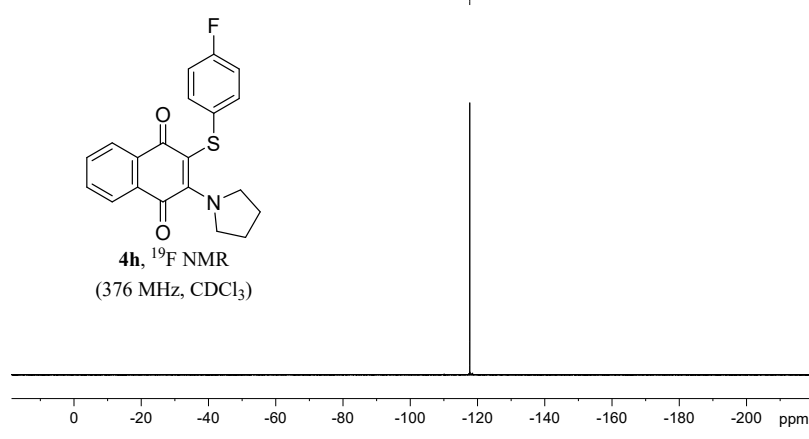

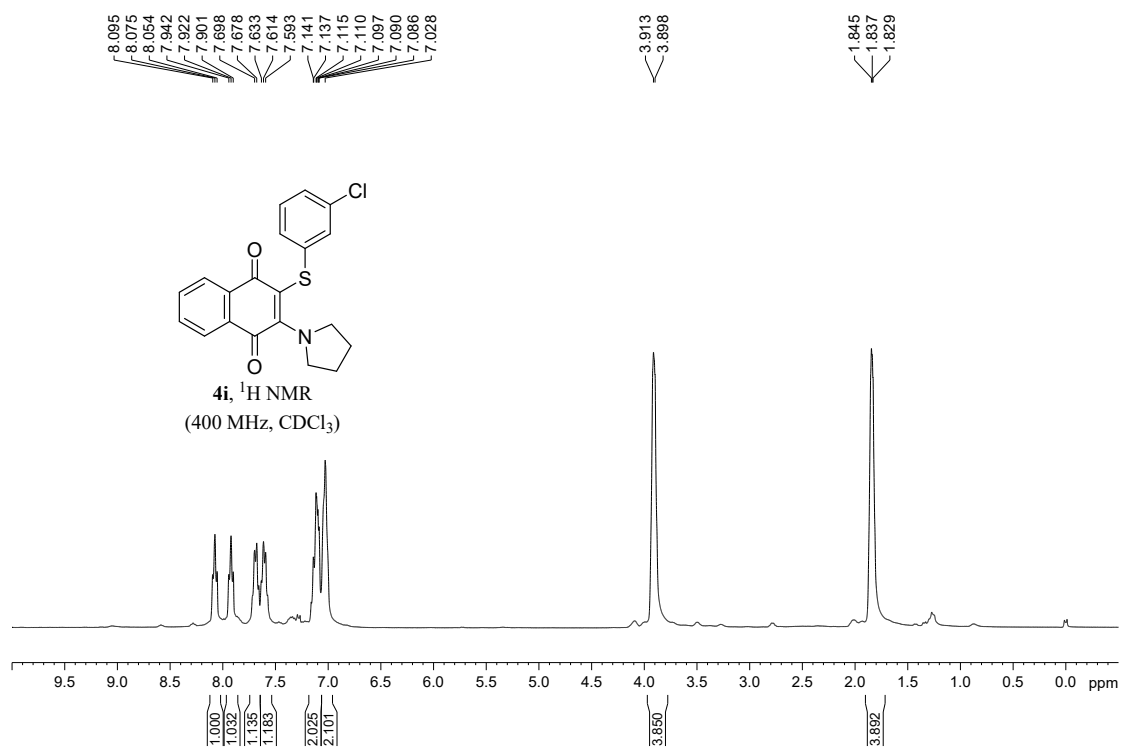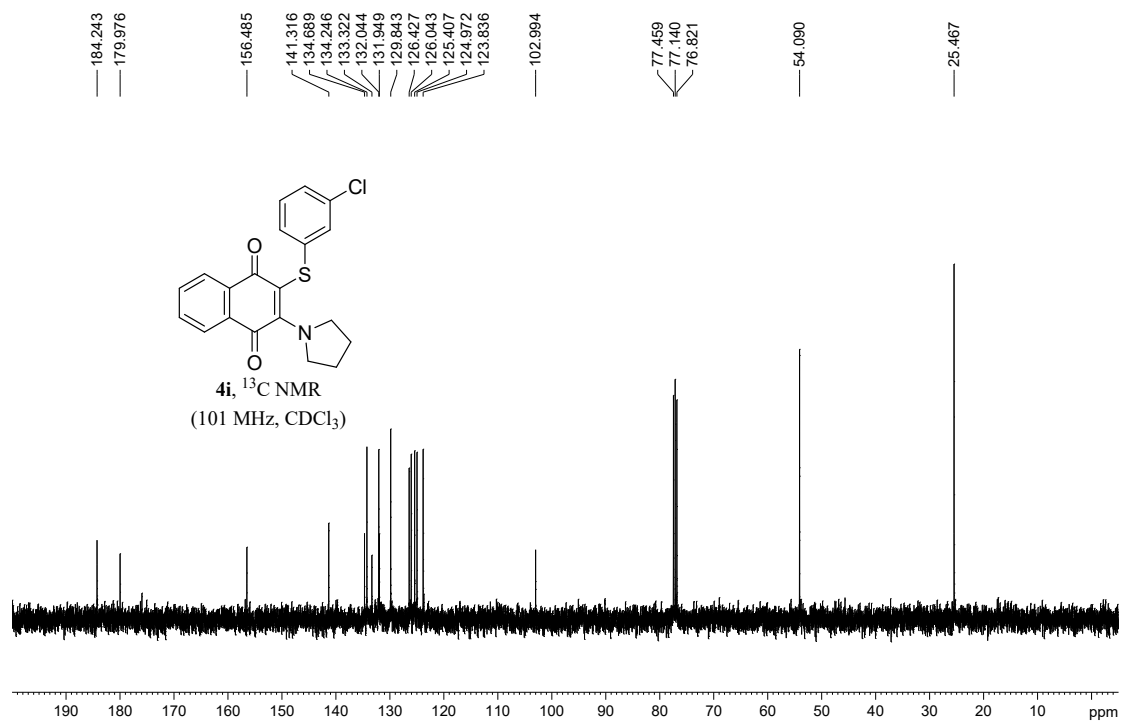



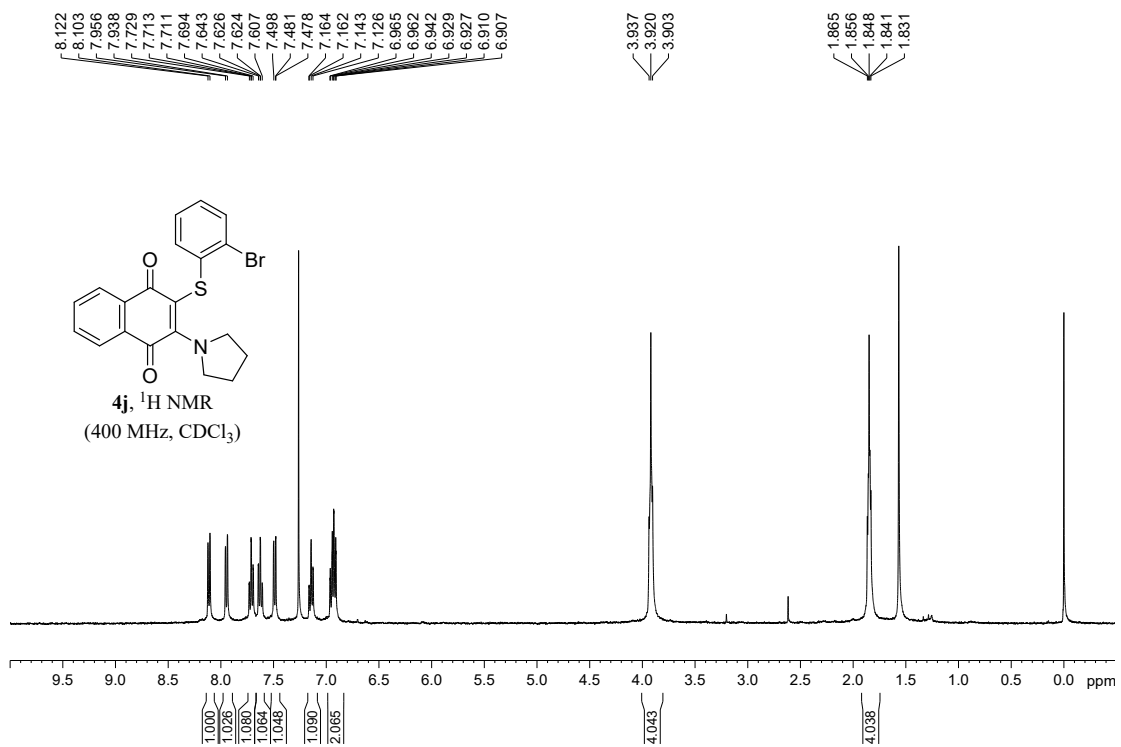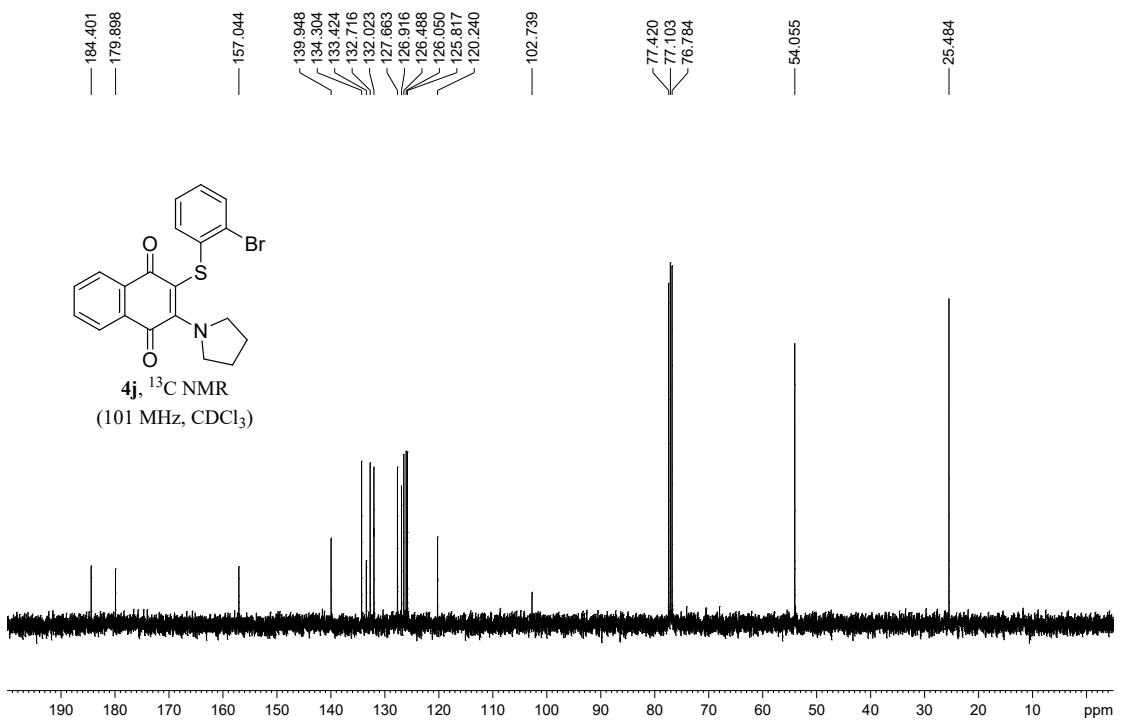

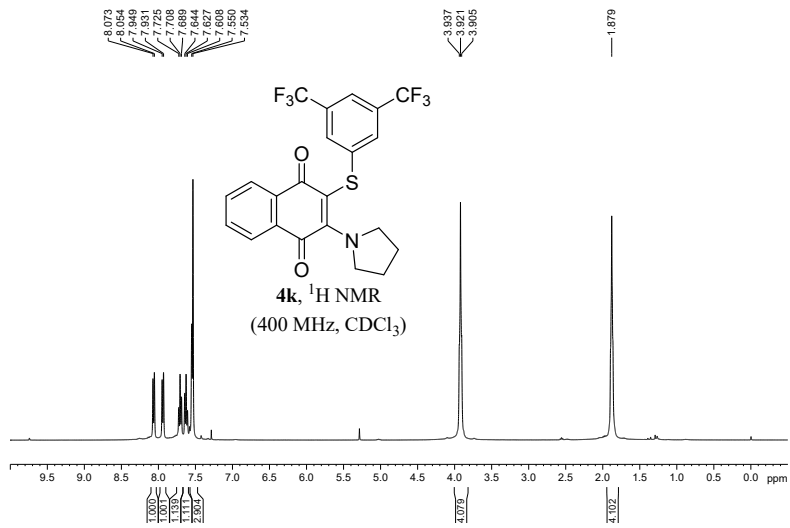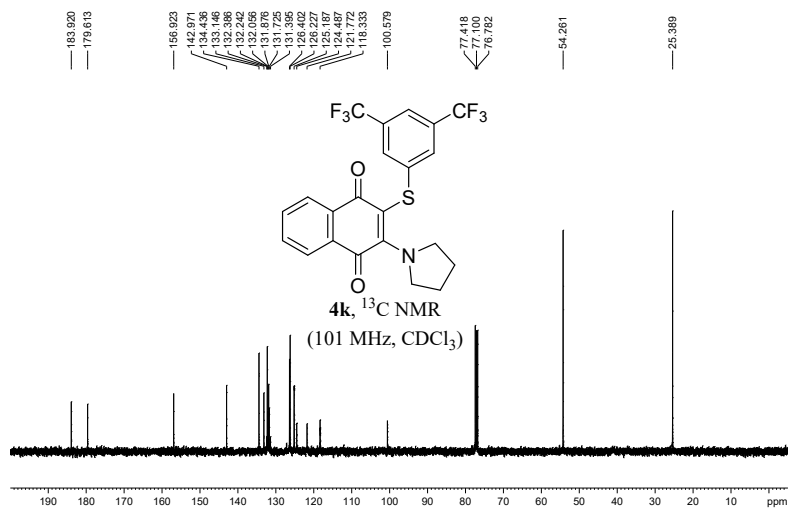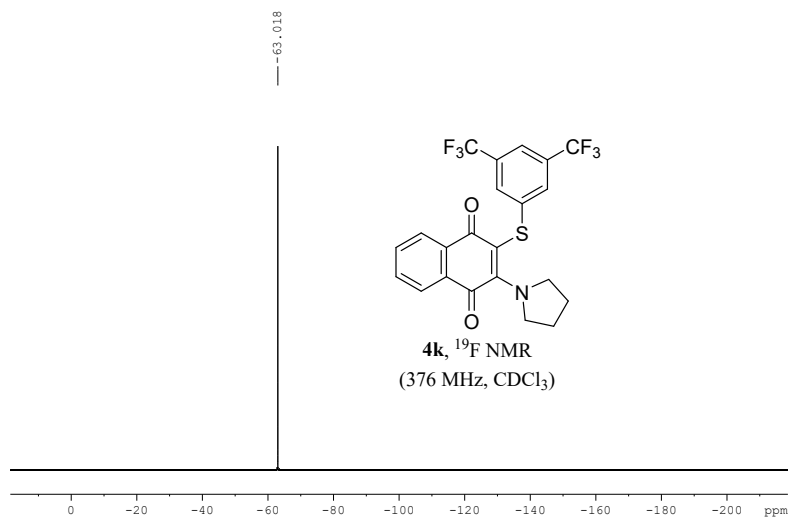

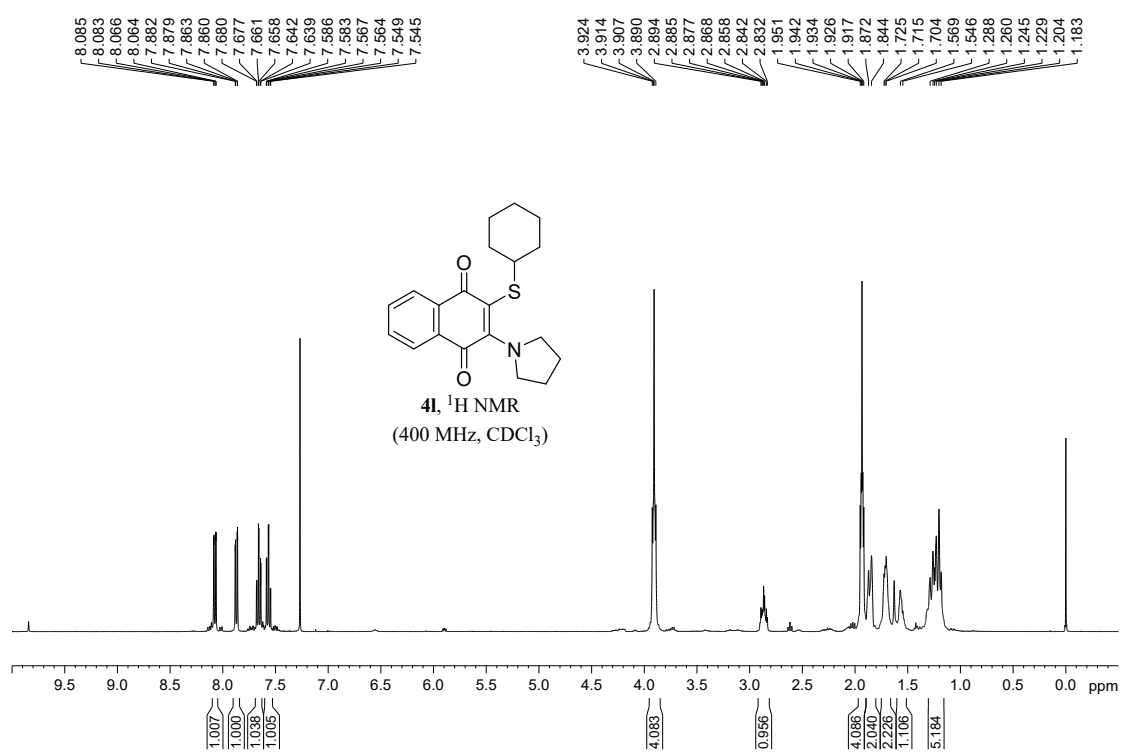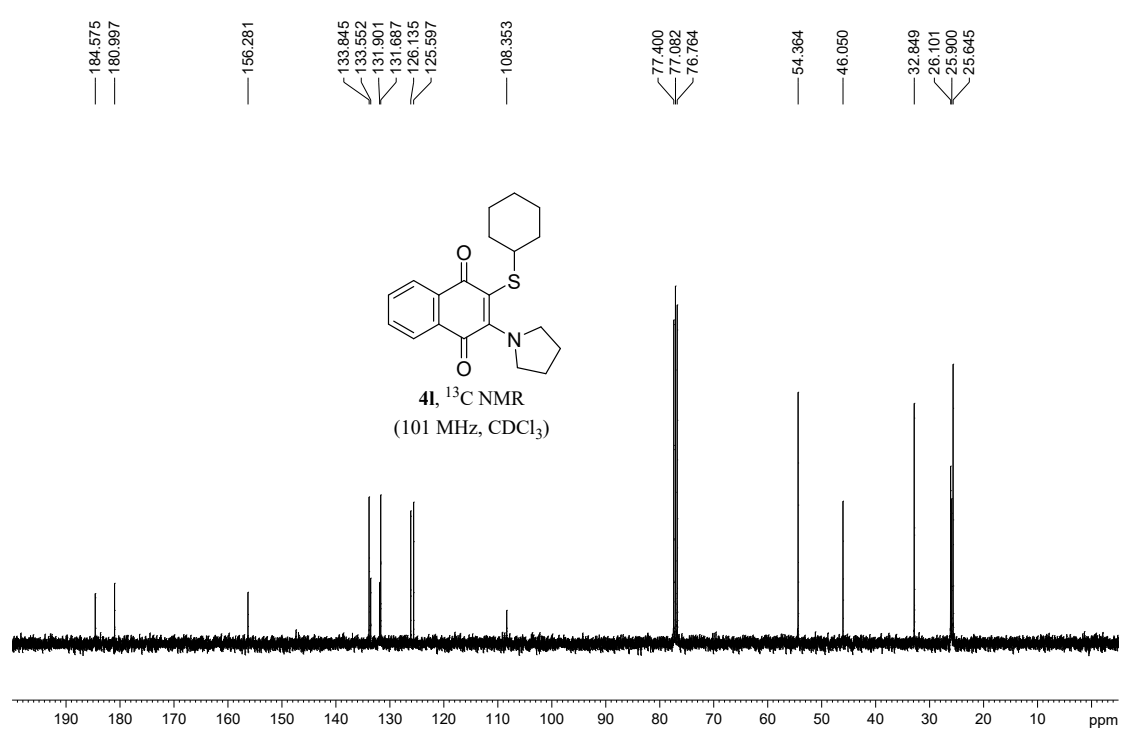

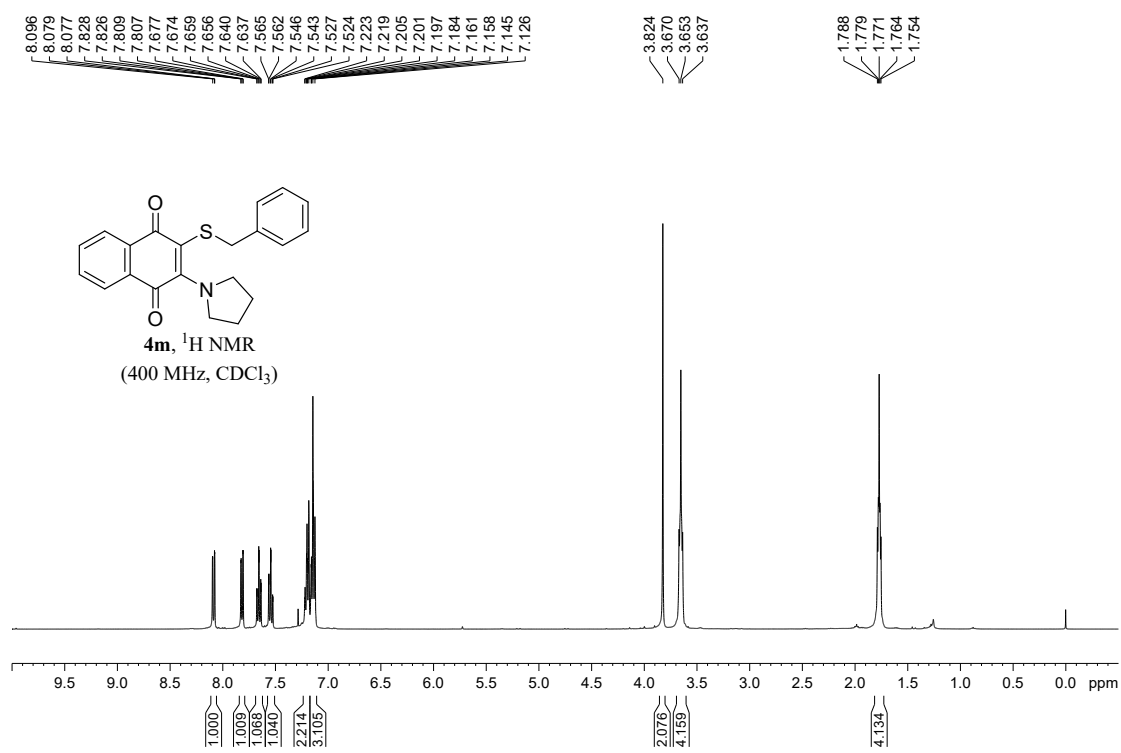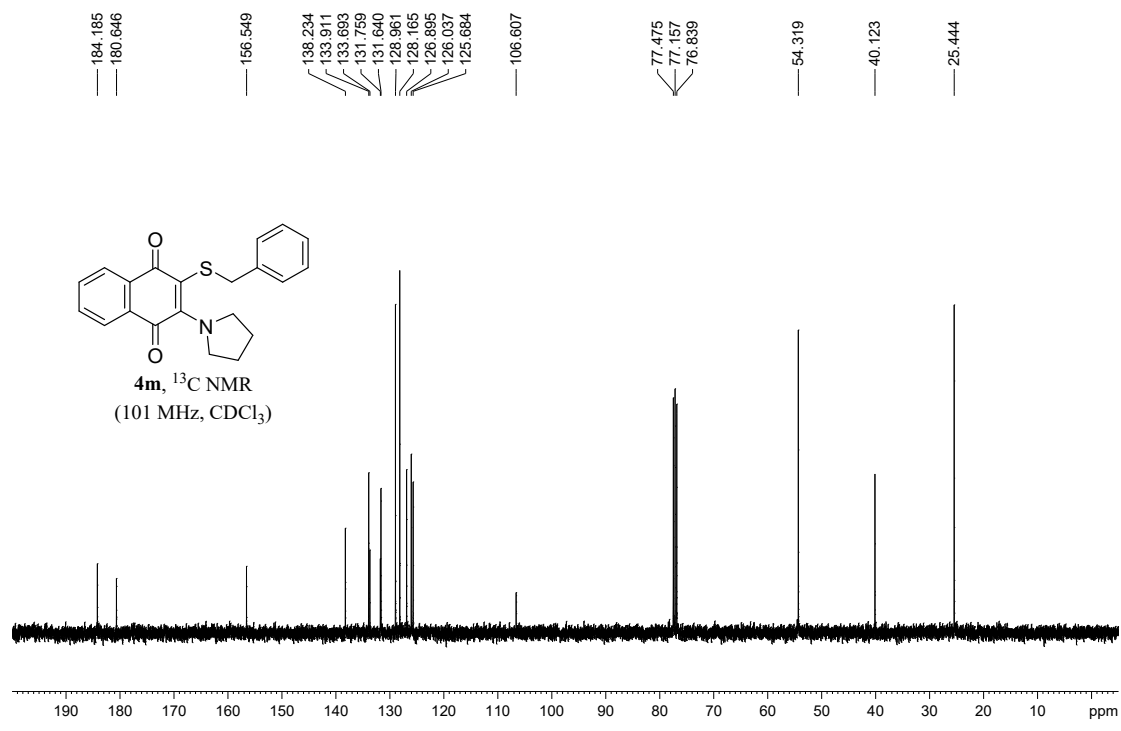

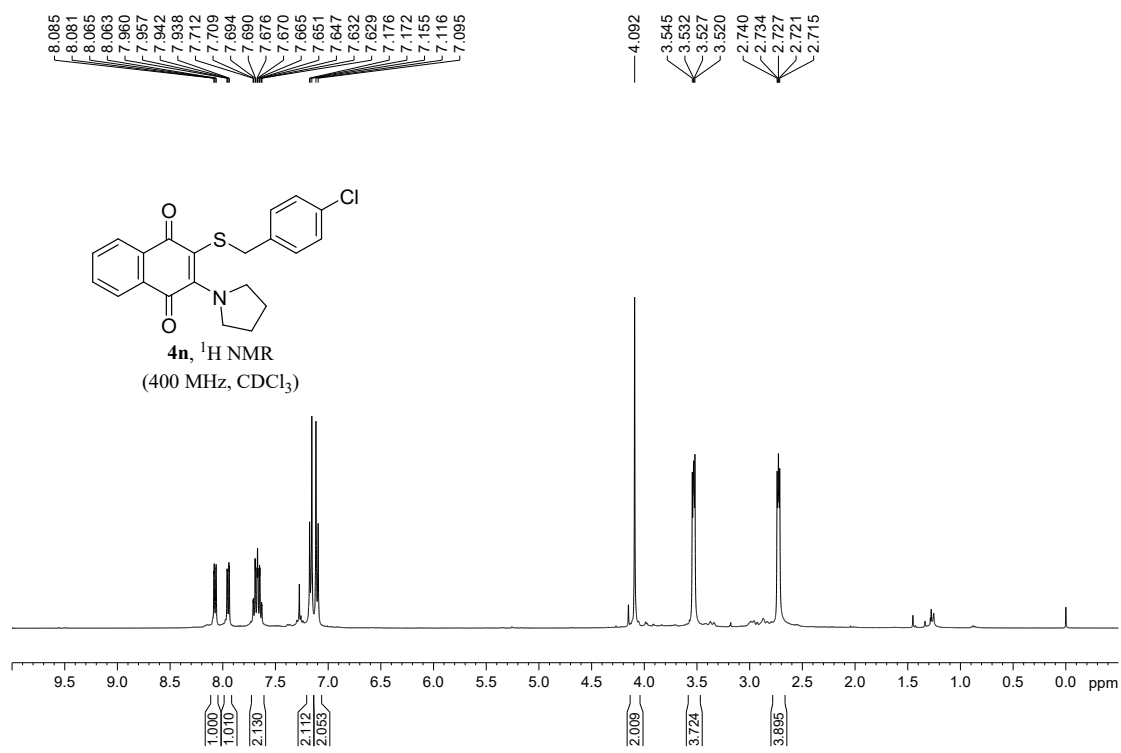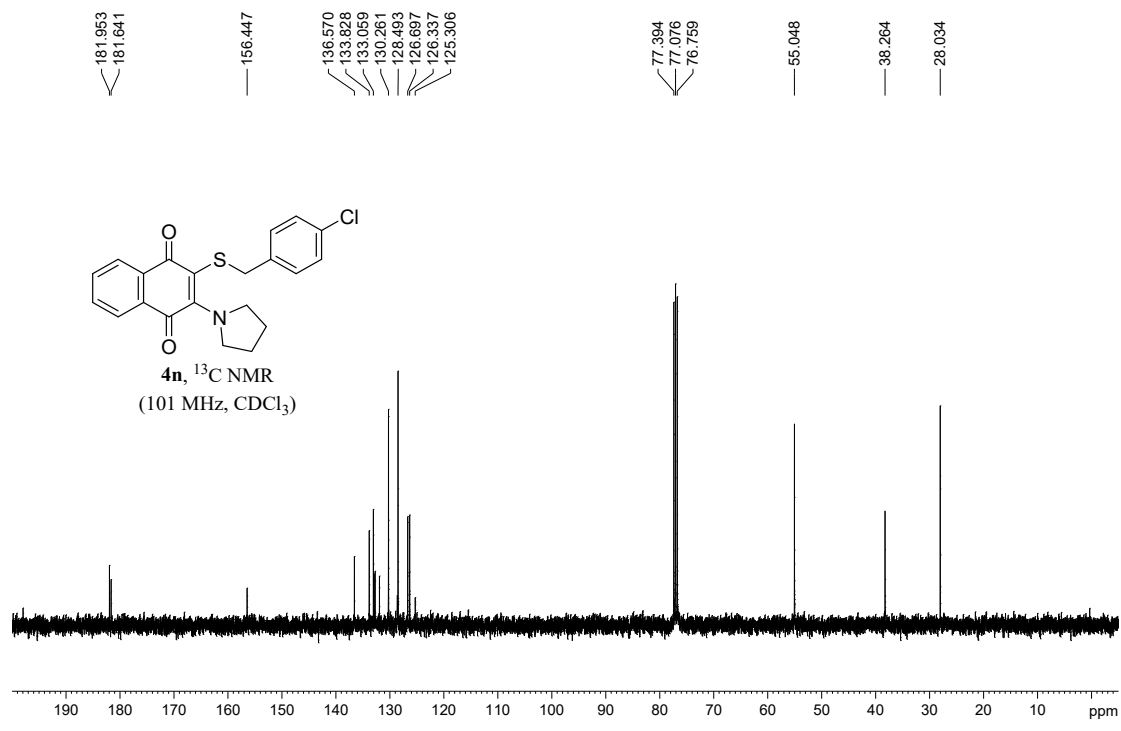

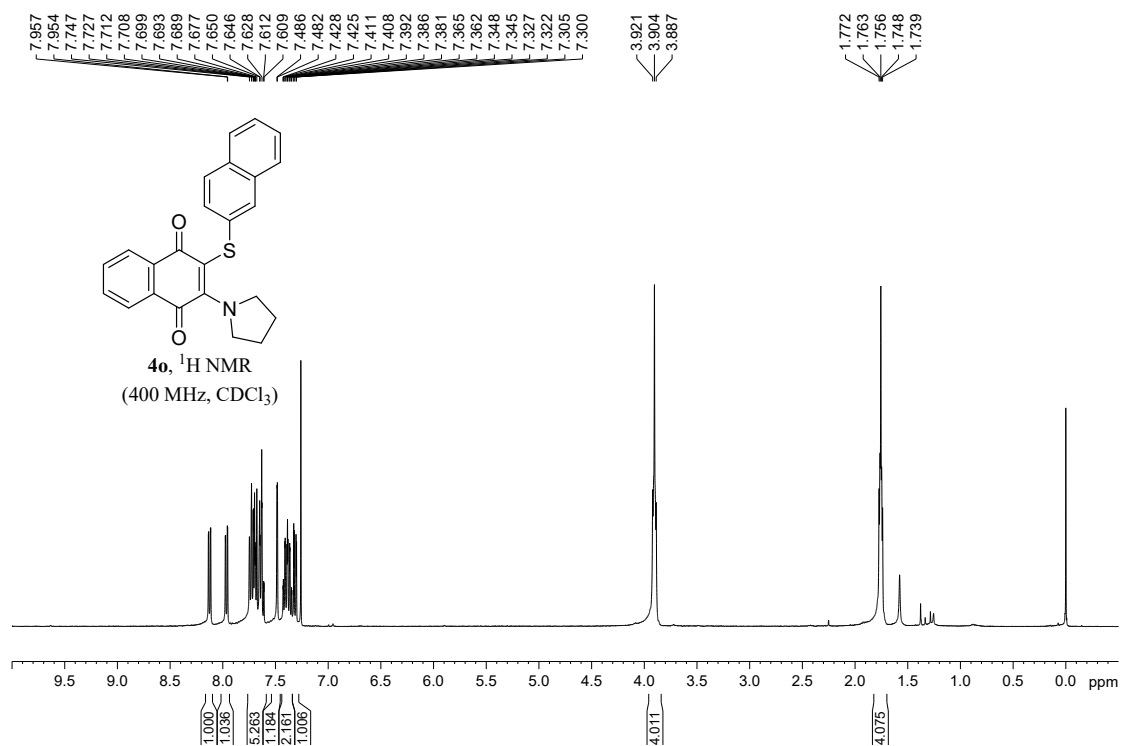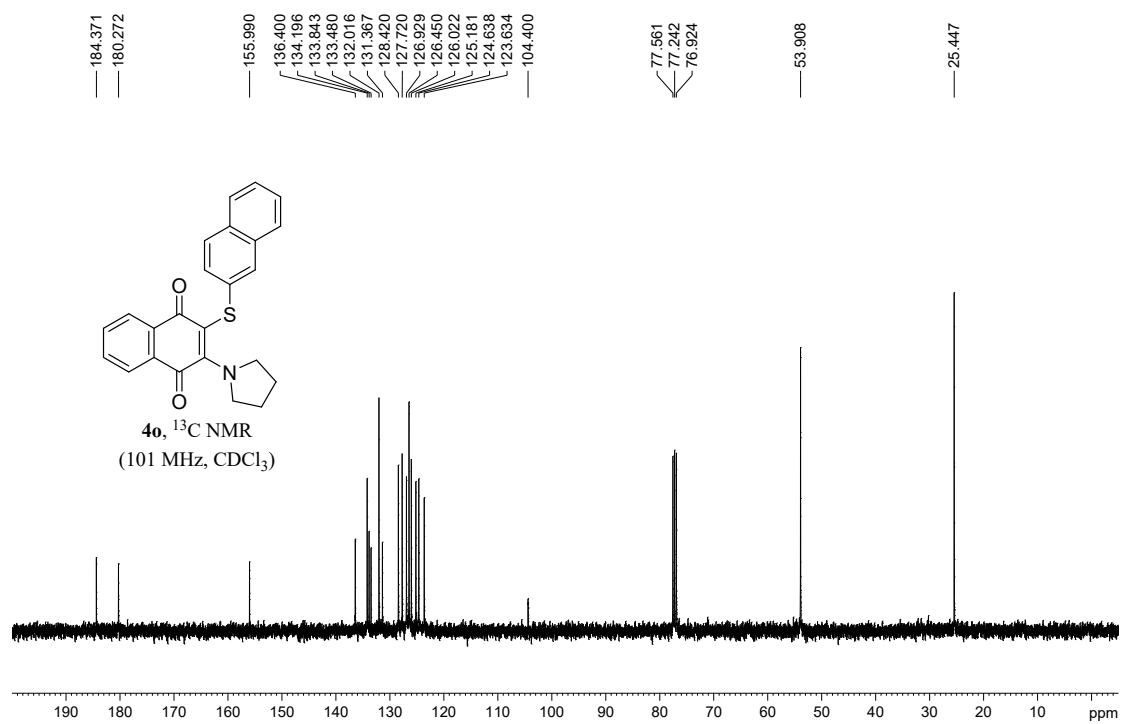

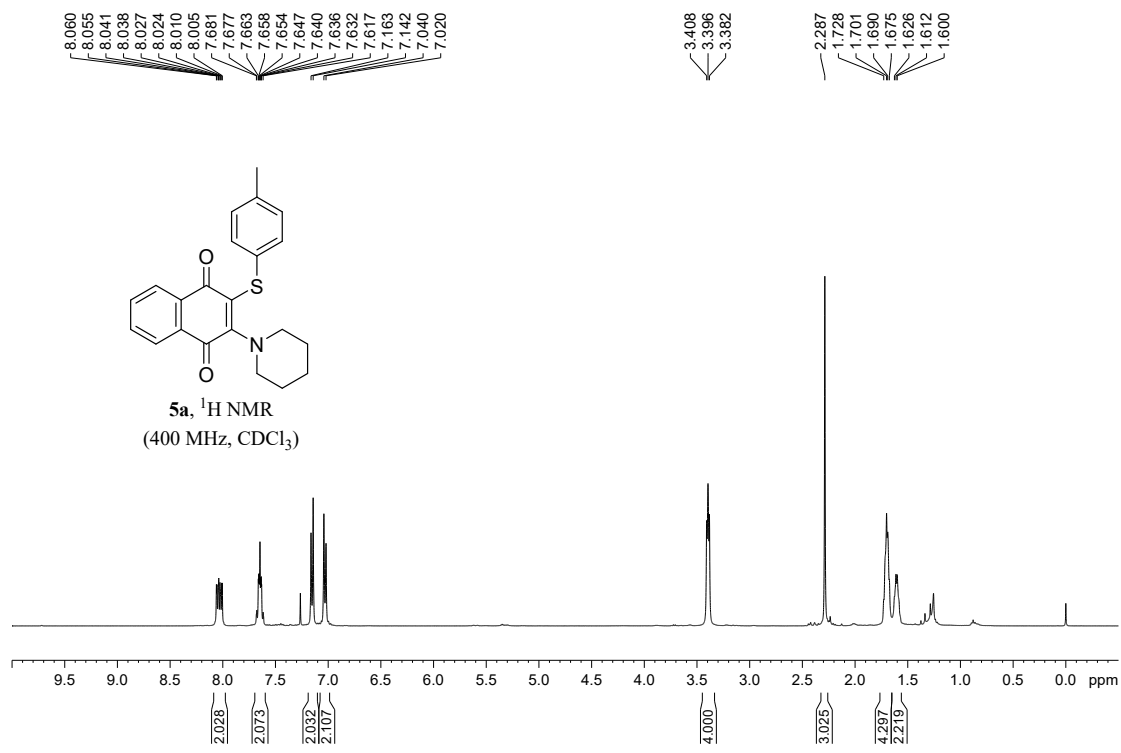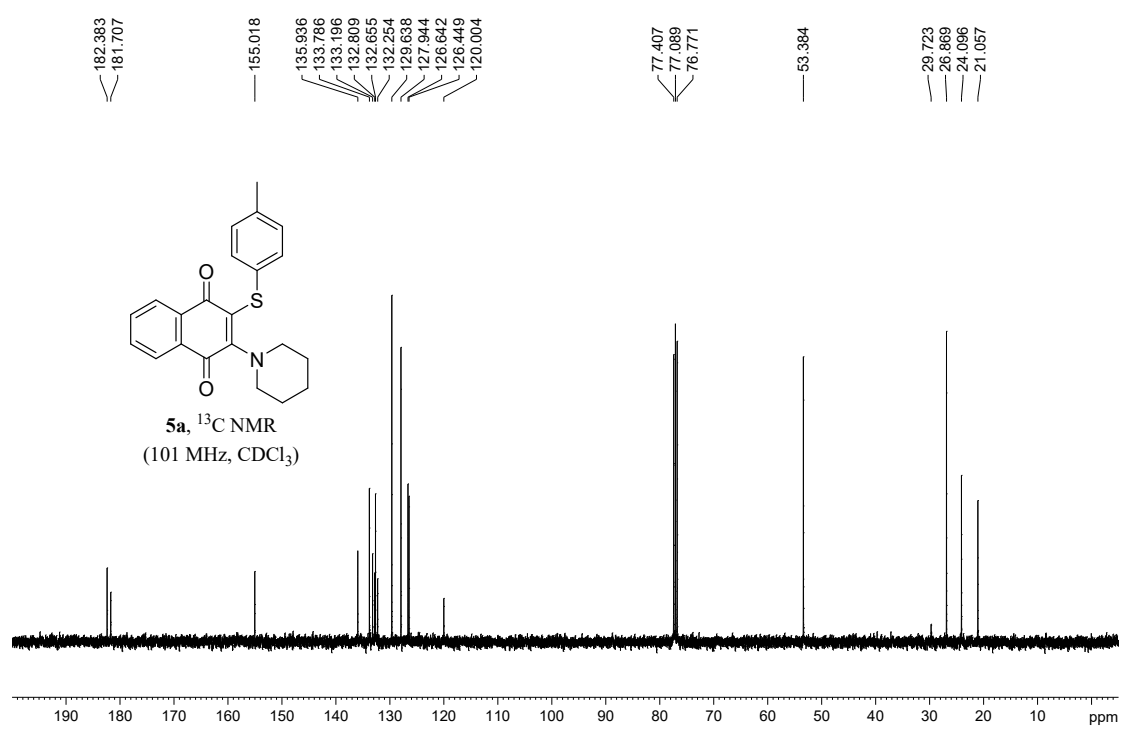

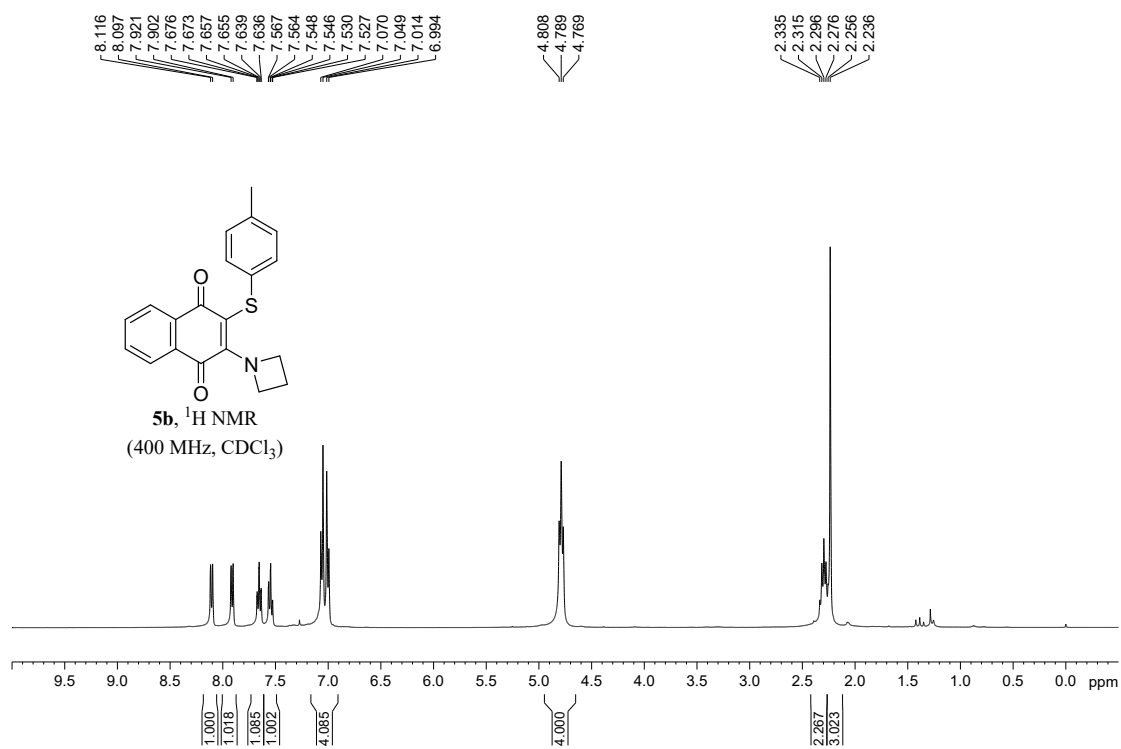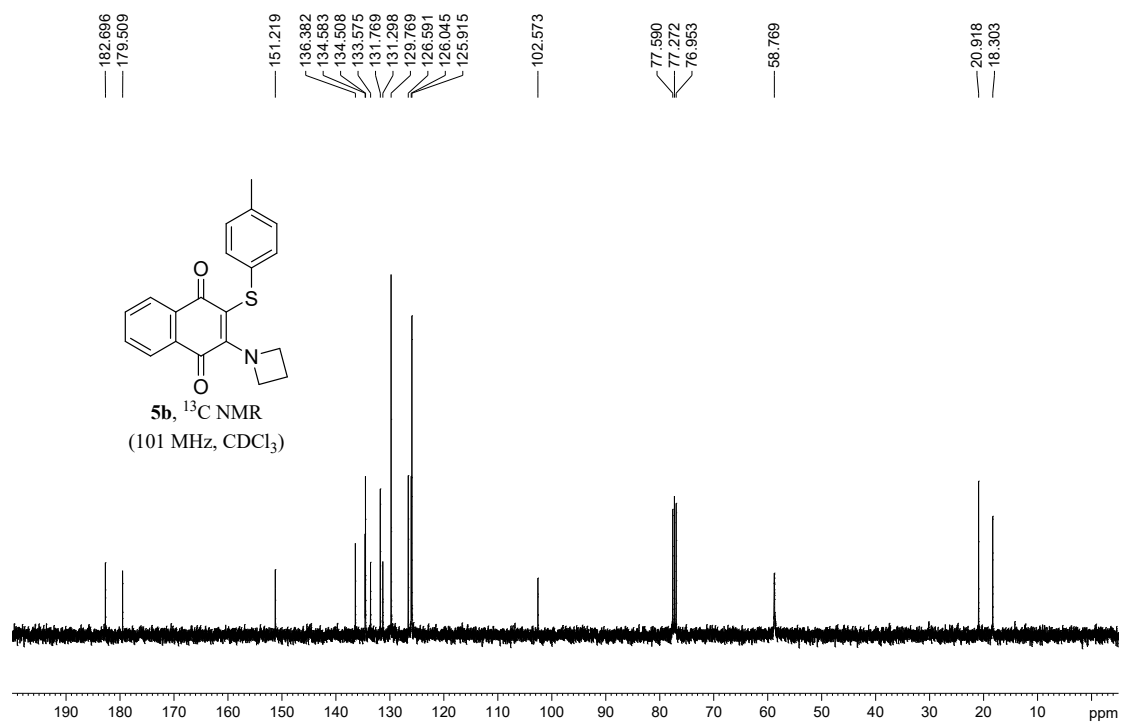



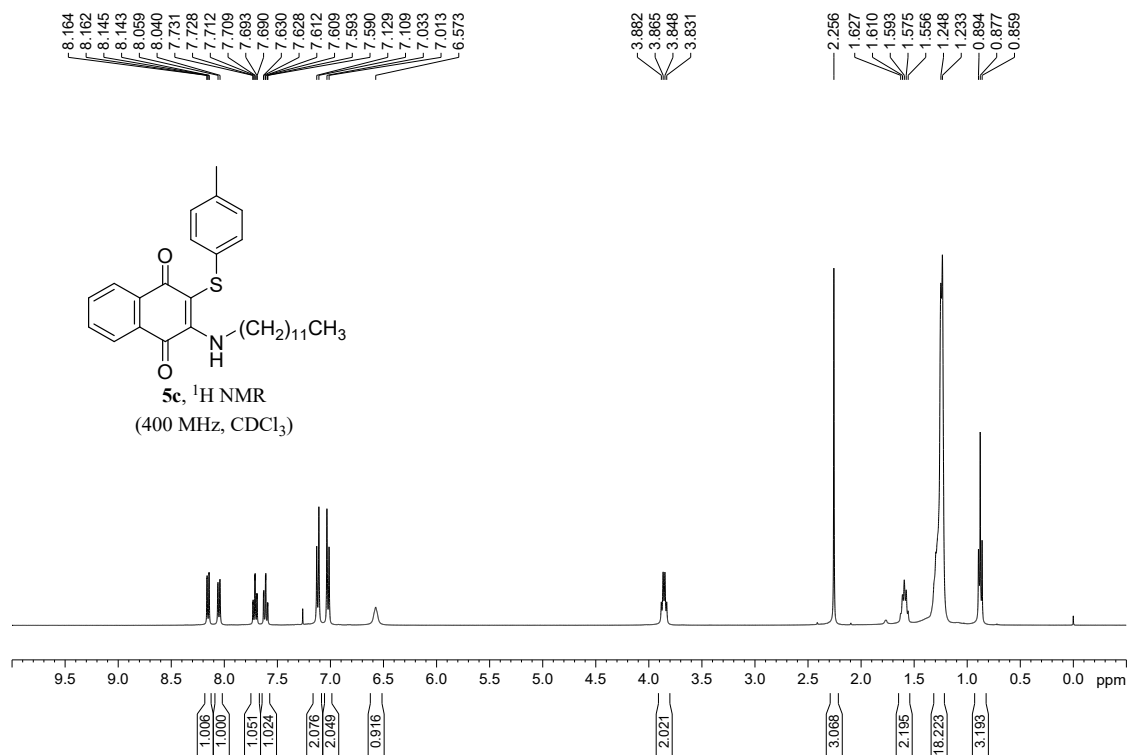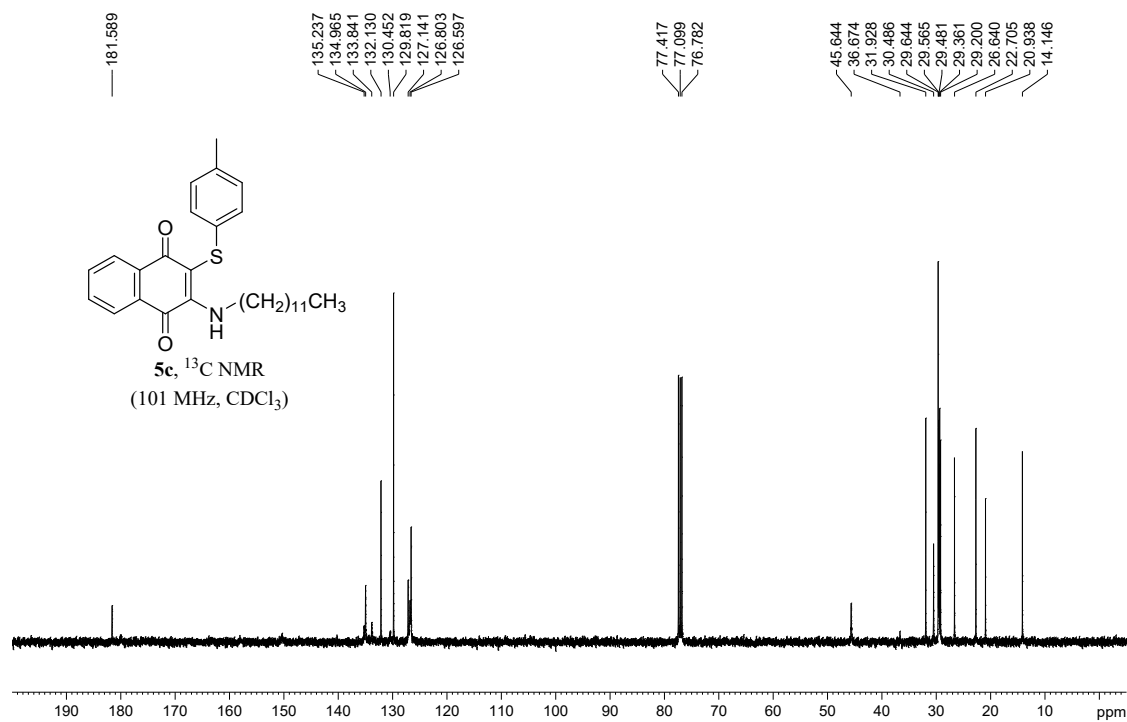

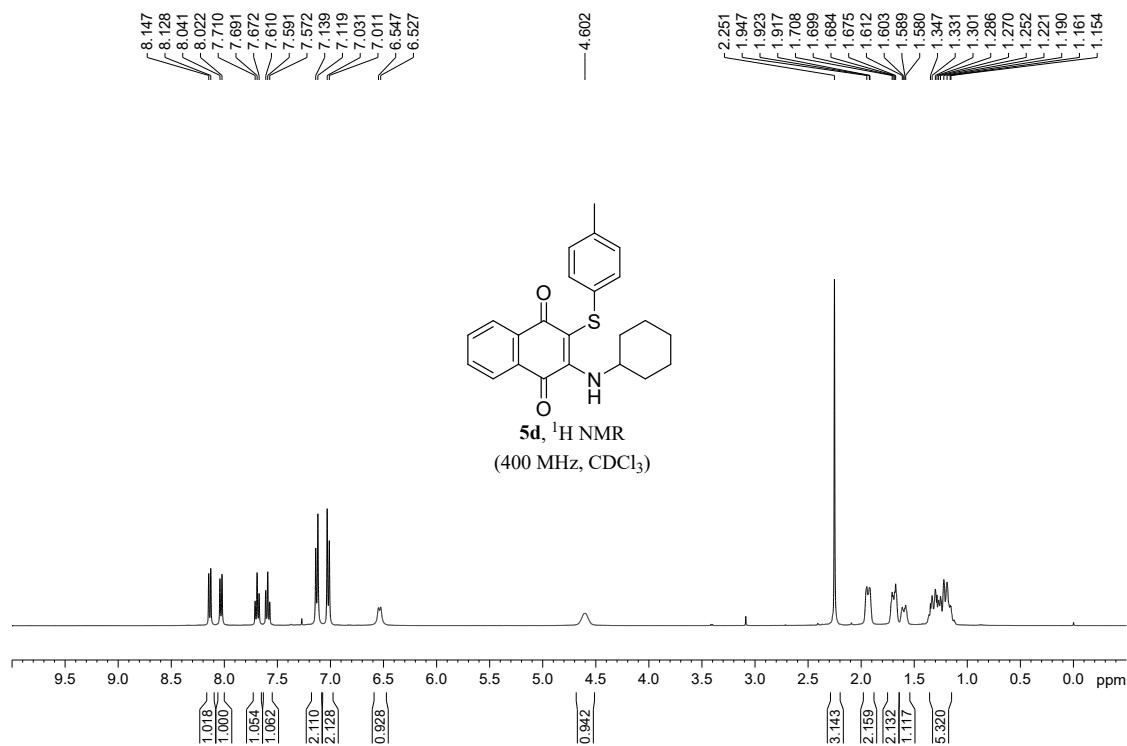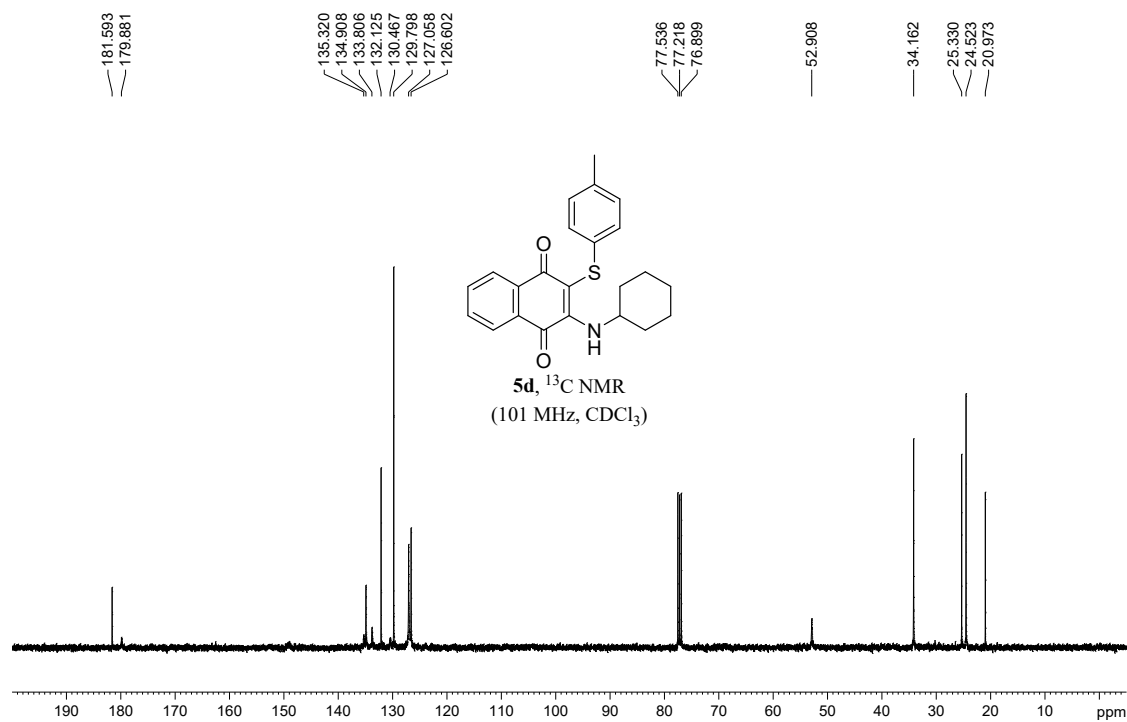

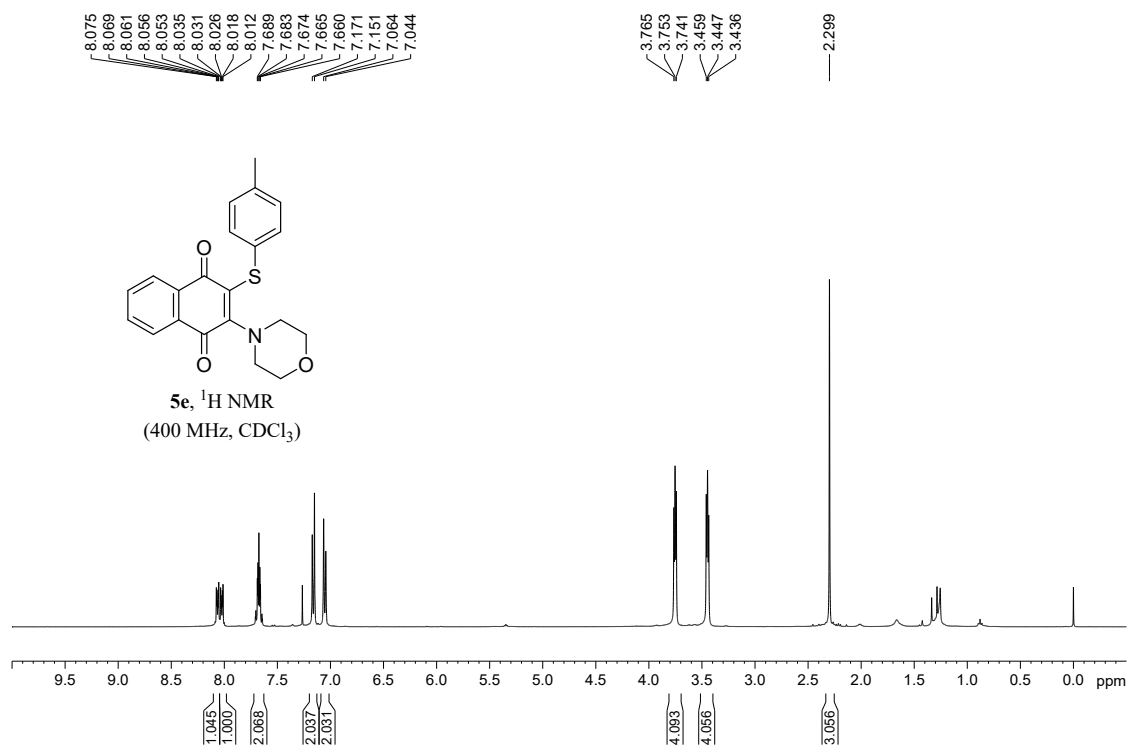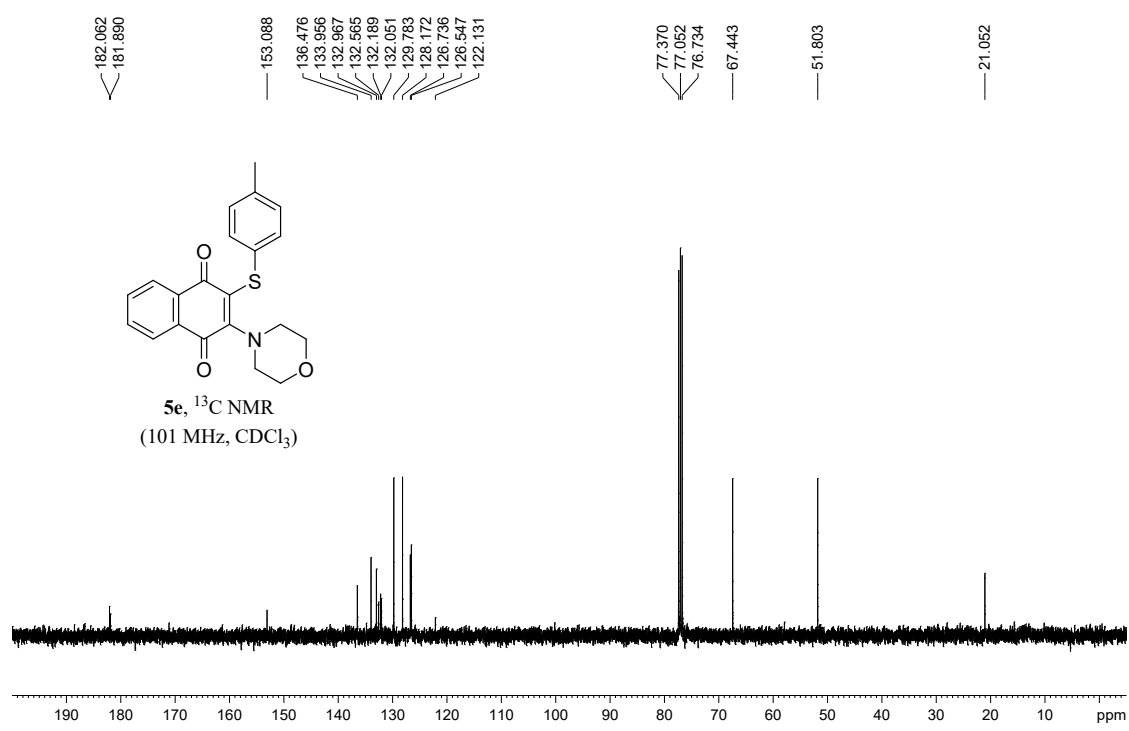

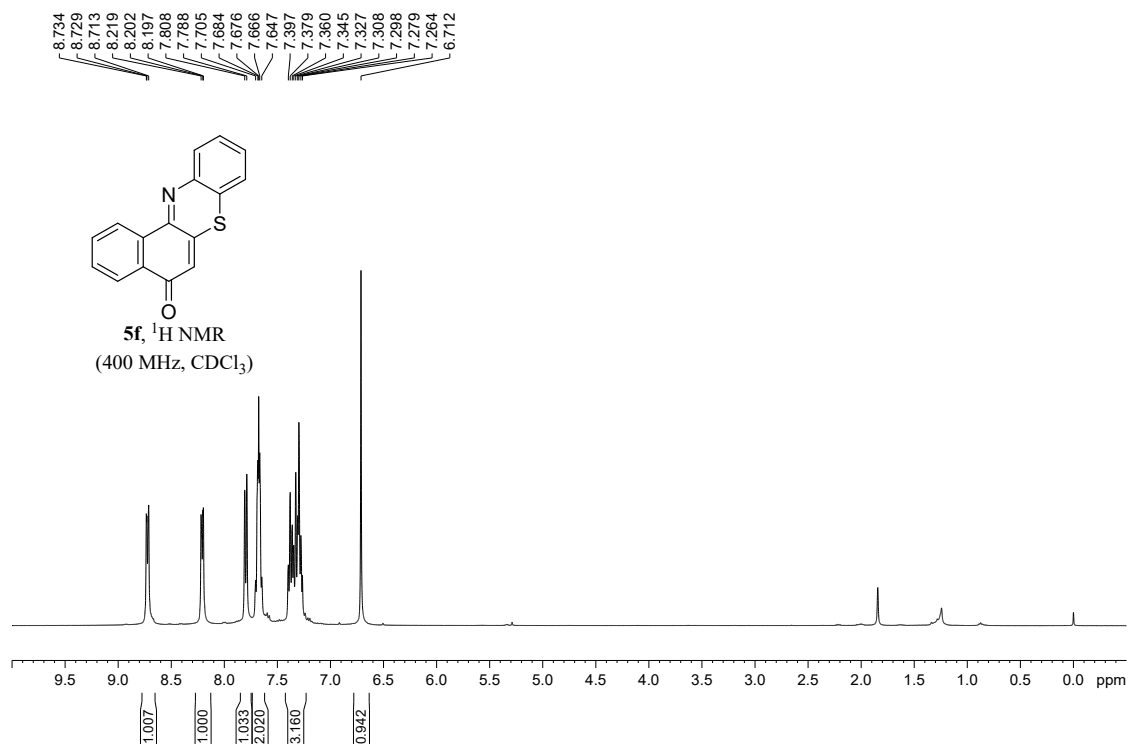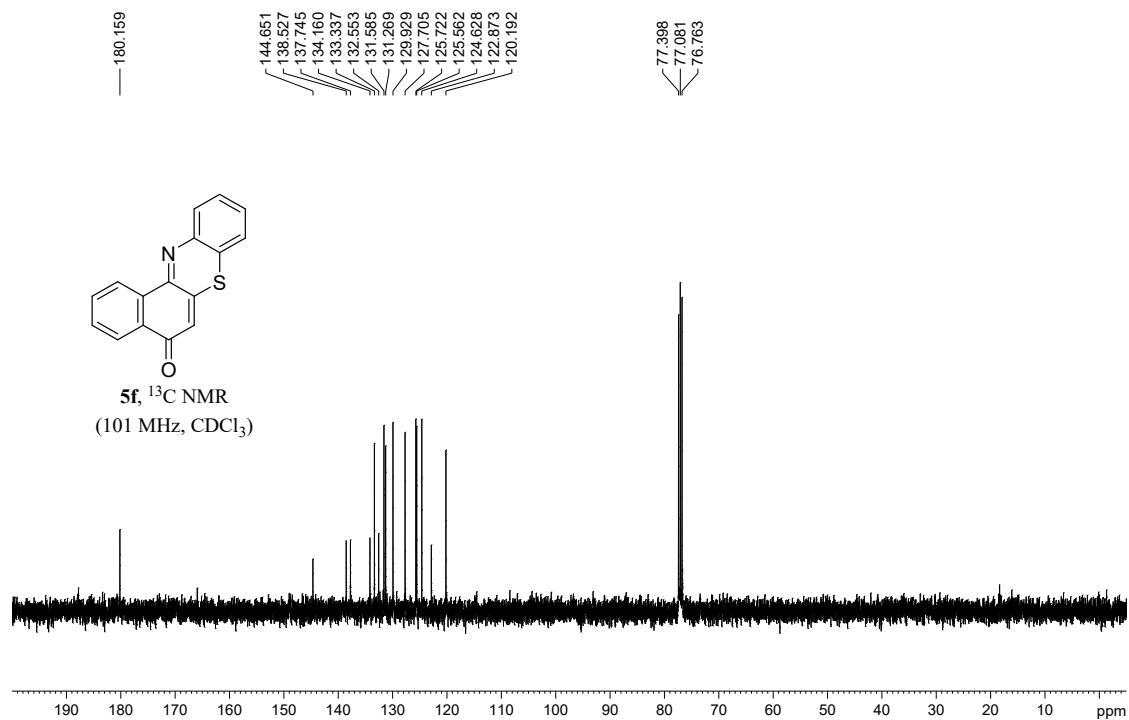

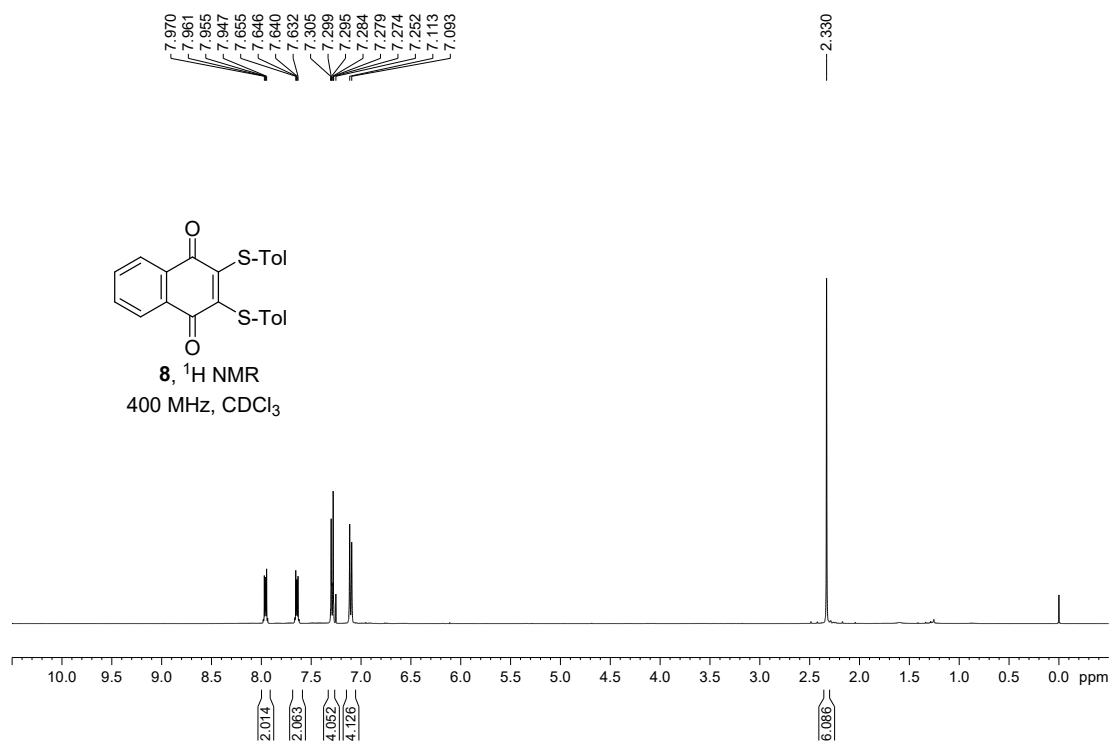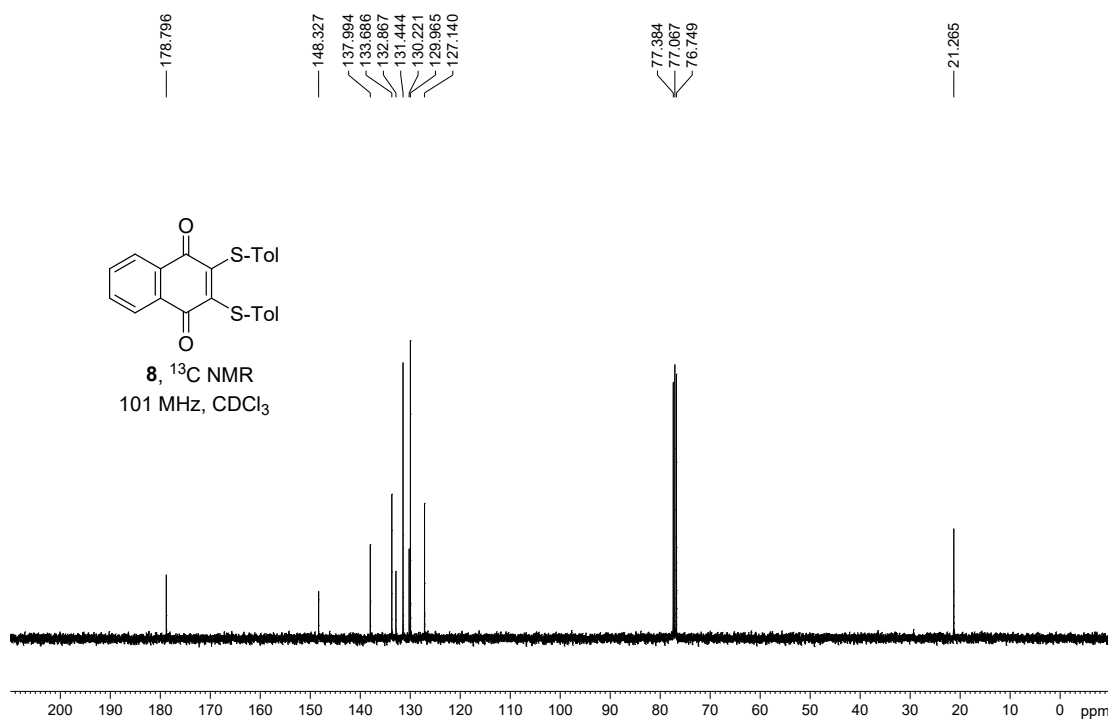

Supplement: d1nj05741c1.pdf [file d1nj05741c1.pdf]
